# Supplementary material for: Decomposition of Gene Expression State Space Trajectories
Source: PubMed Central journal article supplement (PMC2791157; doi:10.1371/journal.pcbi.1000626), 2009-12-24

**RXRA Expression Profiles**

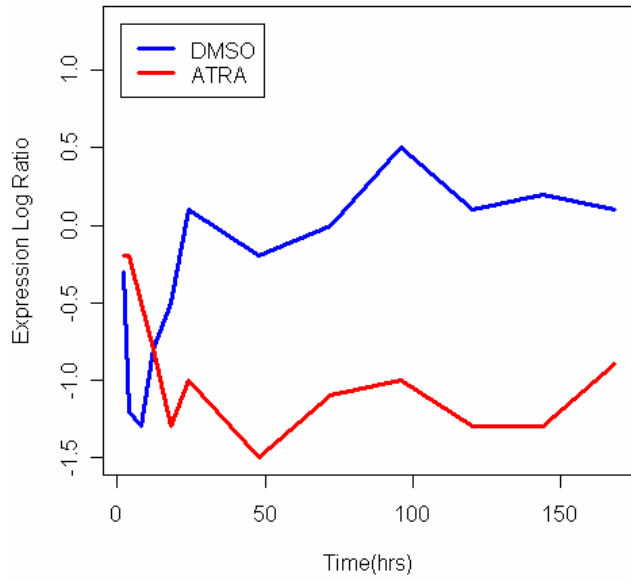

**RXRB Expression Profiles**

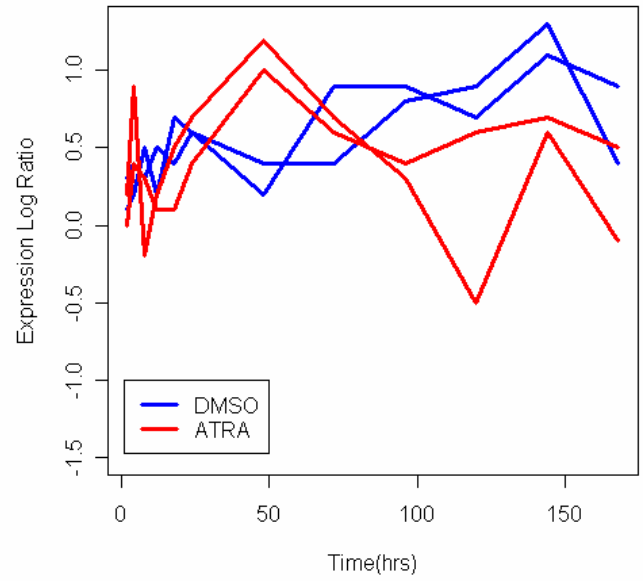

**CD38 Expression Profiles**

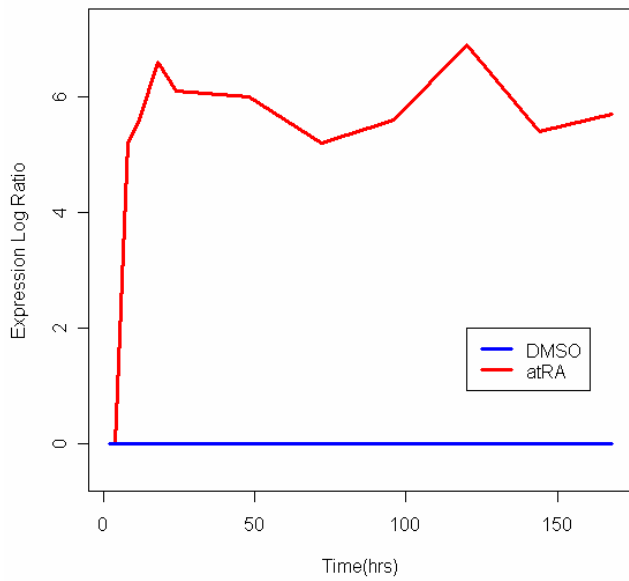

**MBN Expression Profiles**

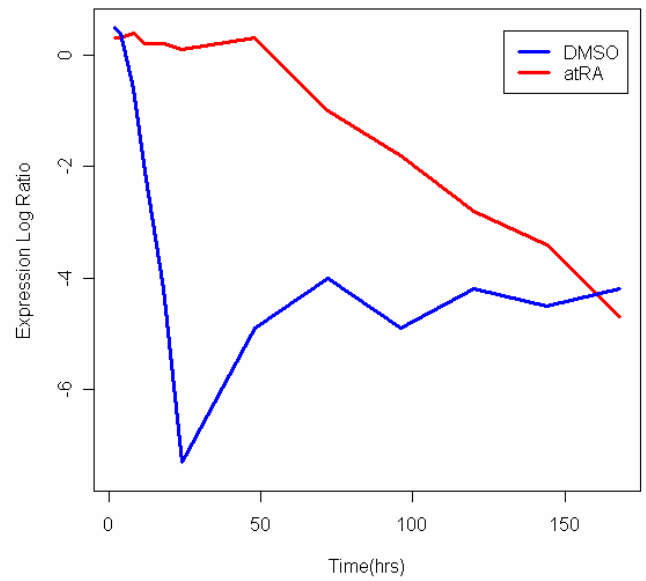

Supplement: pcbi.1000626.s004.pdf [file pcbi.1000626.s004.pdf]
