# Supplementary material for: Decomposition of Gene Expression State Space Trajectories
Source: PubMed Central journal article supplement (PMC2791157; doi:10.1371/journal.pcbi.1000626), 2009-12-24
Supplement: pcbi.1000626.s008.pdf [file pcbi.1000626.s008.pdf]

**Supplemental Table 1: List of 1428 Core Genes**

| Affymetrix ID | GenBank Accession Number | Gene Symbol |
|---------------|--------------------------|-------------|
| 39969_at      | AA255502                 | HIST1H4C    |
| 37506_at      | Z78308                   | PRPF40A     |
| 38533_s_at    | J03925                   | ITGAM       |
| 40775_at      | AL021786                 | ITM2A       |
| 31670_s_at    | U81554                   | CAMK2G      |
| 34278_at      | L18960                   | EIF1AX      |
| 32588_s_at    | X78992                   | ZFP36L2     |
| 40742_at      | M16591                   | HCK         |
| 37985_at      | L37747                   | LMNB1       |
| 36209_at      | S78771                   | BRD2        |
| 40725_at      | AF047438                 | GOSR1       |
| 36982_at      | U30888                   | USP14       |
| 32186_at      | M80244                   | SLC7A5      |
| 40617_at      | AC004381                 | THUMPD1     |
| 307_at        | J03600                   | ALOX5       |
| 33389_at      | U23942                   | CYP51A1     |
| 39158_at      | AB021663                 | ATF5        |
| 663_at        | L18960                   | EIF1AX      |
| 32706_at      | X89887                   | HIRA        |
| 36671_at      | M27396                   | ASNS        |
| 36857_at      | AF084513                 | RAD1        |
| 41572_r_at    | X75042                   | REL         |
| 32921_at      | X83300                   | SMA4        |
| 37485_at      | D88308                   | SLC27A2     |
| 41750_at      | D49489                   | PDIA6       |
| 41242_at      | AB011004                 | UAP1        |
| 37796_at      | AF053356                 | LRCH4       |
| 37918_at      | M15395                   | ITGB2       |
| 38378_at      | M37033                   | CD53        |
| 1336_s_at     | X06318                   | PRKCB1      |
| 34337_s_at    | AJ010014                 | MTF2        |
| 32855_at      | L00352                   | LDLR        |
| 32802_at      | AB011169                 | 39513       |
| 37324_at      | X01060                   | TFRC        |
| 40296_at      | AL023653                 | CXorf9      |
| 36030_at      | AL080214                 | HOM-TES-103 |
| 35249_at      | AF102778                 | CCNE2       |
| 41219_at      | AL050376                 | USP34       |
| 38397_at      | U09196                   | POLD4       |
| 39167_r_at    | D83174                   | SERPINH1    |
| 1191_s_at     | AB003102                 | PSMD11      |
| 39372_at      | W26480                   | FADS1       |
| 39179_at      | Z26248                   | PRG2        |
| 36858_at      | D25218                   | RRS1        |
| 35007_at      | AC004940                 | TWISTNB     |
| 32112_s_at    | AW015732                 | AIM1        |
| 33816_at      | AF020267                 | MYO9B       |
| 33283_at      | AF106941                 | ARRB2       |
| 34183_at      | AL080169                 | CCDC69      |
| 36629_at      | AI635895                 | TSC22D3     |

**Supplemental Table 1: List of 1428 Core Genes**

|            |             |             |
|------------|-------------|-------------|
| 1998_i_at  | U19599      | BAX         |
| 2002_s_at  | U27467      | BCL2A1      |
| 39330_s_at | M95178      | ACTN1       |
| 241_g_at   | M64231      | SRM         |
| 37535_at   | M27691      | CREB1       |
| 36203_at   | X16277      | ODC1        |
| 31536_at   | AB020693    | RTN4        |
| 40424_at   | AI017935    | PROSC       |
| 33369_at   | AI535653    | SC4MOL      |
| 35985_at   | AB023137    | PALM2-AKAP2 |
| 40456_at   | AL049963    | SLC39A8     |
| 34172_s_at | M99578      | SFRS17A     |
| 40521_at   | AL050259    | RGL2        |
| 1856_at    | X75042      | REL         |
| 1008_f_at  | U50648      | EIF2AK2     |
| 41819_at   | U93049      | FYB         |
| 35934_at   | L19161      | EIF2S3      |
| 32451_at   | L35848      | MS4A3       |
| 41683_i_at | U50708      | BCKDHB      |
| 1836_at    | D50310      | CCNI        |
| 40490_at   | U41387      | DDX21       |
| 36899_at   | M97287      | SATB1       |
| 38671_at   | AB014520    | PLXND1      |
| 37037_at   | M24486      | P4HA1       |
| 32321_at   | M16714      | HLA-E       |
| 40399_r_at | AI743406    | MEOX2       |
| 34223_at   | M59818      | CSF3R       |
| 35999_r_at | AB018324    | SNF1LK2     |
| 38303_at   | AB001523    | TMEM1       |
| 33936_at   | L23116      | GALC        |
| 36197_at   | Y08374      | CHI3L1      |
| 596_s_at   | M59820      | CSF3R       |
| 41193_at   | AB013382    | DUSP6       |
| 34563_at   | D26361      | KIF14       |
| 1725_s_at  | HG884-HT884 | NA          |
| 38010_at   | AF002697    | BNIP3       |
| 41322_s_at | AI816034    | NOLA2       |
| 39799_at   | M94856      | FABP5       |
| 38805_at   | X89750      | TGIF1       |
| 31867_at   | AF052174    | NA          |
| 673_at     | J04031      | MTHFD1      |
| 33294_at   | D29958      | EXOSC7      |
| 40463_at   | U72395      | TNPO1       |
| 33855_at   | M96995      | GRB2        |
| 35018_at   | U61538      | CHP         |
| 39566_at   | X70297      | CHRNA7      |
| 40719_at   | AL022398    | TRAF3IP3    |
| 40721_g_at | AL022398    | TRAF3IP3    |
| 41047_at   | AI885170    | C9orf16     |
| 35779_at   | AJ133421    | VPS45       |
| 40923_at   | AA290994    | SLC36A1     |

**Supplemental Table 1: List of 1428 Core Genes**

|            |          |          |
|------------|----------|----------|
| 794_at     | X62055   | PTPN6    |
| 32548_at   | L24804   | PTGES3   |
| 38435_at   | U25182   | PRDX4    |
| 41465_at   | AJ236885 | ZNF148   |
| 41223_at   | M22760   | COX5A    |
| 1081_at    | M33764   | ODC1     |
| 41691_at   | AB018337 | UBXD7    |
| 1602_at    | L33881   | PRKCI    |
| 40036_at   | AF035940 | MAGOH    |
| 40464_g_at | U72395   | TNPO1    |
| 35295_g_at | M25077   | TROVE2   |
| 39423_f_at | AJ000644 | SPOP     |
| 39748_at   | AL050021 | SLC7A1   |
| 34741_at   | U18422   | TFDP2    |
| 35303_at   | U96876   | INSIG1   |
| 36190_at   | M63256   | CDR2     |
| 39839_at   | M24069   | CSDA     |
| 41591_at   | AI652978 | WDR68    |
| 36813_at   | U96131   | TRIP13   |
| 40495_at   | AA306076 | ORAI2    |
| 41246_at   | AL040655 | SERPINE2 |
| 41850_s_at | U63825   | CCDC85B  |
| 37095_r_at | M84562   | FPRL1    |
| 32113_at   | U83115   | AIM1     |
| 34206_at   | AB018325 | CENTD2   |
| 32737_at   | M64595   | RAC2     |
| 39049_at   | AJ243937 | GPSM3    |
| 39424_at   | U70321   | TNFRSF14 |
| 40569_at   | M58297   | MZF1     |
| 41252_s_at | W28614   | PLEKHB2  |
| 1693_s_at  | D11139   | TIMP1    |
| 1217_g_at  | X07109   | PRKCB1   |
| 41720_r_at | AF009767 | FADS1    |
| 34279_at   | AL050141 | NBPF10   |
| 39328_at   | M11058   | HMGCR    |
| 32803_at   | AF104398 | CNIH     |
| 32720_at   | AA151716 | ATG12    |
| 37282_at   | AJ000186 | MAD2L1   |
| 39353_at   | U07550   | HSPE1    |
| 41485_at   | X02152   | LDHA     |
| 41713_at   | U09848   | ZKSCAN1  |
| 35839_at   | D78130   | SQLE     |
| 1603_g_at  | L33881   | PRKCI    |
| 36561_at   | X73424   | PCCB     |
| 40441_g_at | AL080119 | SERBP1   |
| 41133_at   | U32519   | G3BP1    |
| 442_at     | X15187   | HSP90B1  |
| 32047_at   | U91985   | DFFA     |
| 37174_at   | D14660   | MRPL19   |
| 2036_s_at  | M59040   | CD44     |
| 34912_at   | AF052941 | DAPK2    |

**Supplemental Table 1: List of 1428 Core Genes**

|            |               |             |
|------------|---------------|-------------|
| 33804_at   | U43522        | PTK2B       |
| 34709_r_at | Z75331        | STAG2       |
| 36870_at   | AB018347      | VPS8        |
| 40098_at   | AF001434      | EHD1        |
| 39062_at   | AL008726      | CTSA        |
| 32257_f_at | AF003001      | TERF1       |
| 34318_at   | AJ005896      | PRAF2       |
| 34408_at   | AF004222      | RTN2        |
| 35824_at   | AJ223321      | ZNF238      |
| 40219_at   | AI796944      | HEXIM1      |
| 1146_at    | HG3477-HT3670 | NA          |
| 993_at     | X54637        | TYK2        |
| 957_at     | HG2059-HT2114 | NA          |
| 910_at     | M15205        | TK1         |
| 37975_at   | X04011        | CYBB        |
| 34777_at   | D14874        | ADM         |
| 40780_at   | AF016507      | CTBP2       |
| 1272_at    | L19161        | EIF2S3      |
| 35136_at   | AL031387      | NXT2        |
| 39041_at   | Y00978        | DLAT        |
| 36135_at   | U86602        | EBNA1BP2    |
| 40587_s_at | AF054186      | EEF1E1      |
| 41510_s_at | L15189        | HSPA9       |
| 36685_at   | W63793        | AMD1        |
| 38424_at   | AB018290      | FAM62A      |
| 33307_at   | AL022316      | CTA-126B4.3 |
| 39756_g_at | Z93930        | XBP1        |
| 40151_s_at | Z48054        | PEX5        |
| 1909_at    | M14745        | BCL2        |
| 1473_s_at  | U22376        | MYB         |
| 31443_at   | S76346        | RUNX1       |
| 35419_g_at | J04178        | HEXA        |
| 34481_at   | AF030227      | VAV1        |
| 38216_at   | L40411        | JMJD1C      |
| 38895_i_at | X77094        | NCF4        |
| 38945_at   | X78710        | MTF1        |
| 39280_at   | U80744        | TNRC5       |
| 41622_r_at | X78924        | ZNF266      |
| 32740_at   | AB023158      | RAB11FIP2   |
| 35199_at   | AB023199      | WDR37       |
| 40045_g_at | AF009425      | C18orf1     |
| 35341_at   | U90547        | TRIM38      |
| 36626_at   | X87176        | HSD17B4     |
| 39525_at   | AL120687      | PLEKHB2     |
| 2062_at    | L19182        | IGFBP7      |
| 1532_g_at  | U50535        | PFAAP5      |
| 1456_s_at  | M63838        | IFI16       |
| 362_at     | Z15108        | PRKCZ       |
| 364_s_at   | Z16411        | PLCB3       |
| 38831_f_at | AF053356      | GNB2        |
| 1997_s_at  | U19599        | BAX         |

**Supplemental Table 1: List of 1428 Core Genes**

|            |          |          |
|------------|----------|----------|
| 41760_at   | AA978033 | COX7A2   |
| 35818_at   | U52111   | CYCS     |
| 37263_at   | U55206   | GGH      |
| 41085_at   | AF025840 | POLE2    |
| 34286_at   | AB020623 | BCAS2    |
| 38676_at   | AA059408 | STCH     |
| 35364_at   | U50939   | APPBP1   |
| 34400_at   | A1540957 | UQCRQ    |
| 36992_at   | A1653621 | TXN      |
| 36012_at   | Y09631   | C13orf24 |
| 38260_at   | AL050306 | LAS1L    |
| 36191_at   | M62810   | TFAM     |
| 38076_at   | X69907   | ATP5G1   |
| 39088_at   | Y18007   | TMEM147  |
| 860_at     | U03911   | MSH2     |
| 37520_at   | AJ006591 | ZNF330   |
| 33230_at   | AJ131186 | PRPF19   |
| 35709_at   | AF038172 | RFK      |
| 39377_at   | D87453   | MRPS27   |
| 40861_at   | D14812   | MORF4L2  |
| 35255_at   | AF098799 | IPO7     |
| 37640_at   | M31642   | HPRT1    |
| 39385_at   | M22324   | ANPEP    |
| 33394_at   | AW016836 | DDX19A   |
| 34936_at   | AB012130 | SLC4A7   |
| 36317_at   | U57057   | CORO2A   |
| 37883_i_at | A1375033 | C2orf27  |
| 39637_at   | U14528   | SLC26A2  |
| 36551_at   | AL049382 | C12orf29 |
| 39059_at   | AF034544 | DHCR7    |
| 40122_at   | AF037448 | SYNCRIP  |
| 37699_at   | U29607   | METAP2   |
| 1287_at    | J03473   | PARP1    |
| 34584_at   | L75847   | ZNF45    |
| 34046_at   | Z83844   | SH3BP1   |
| 37474_at   | AF025441 | OIP5     |
| 38894_g_at | AL008637 | NCF4     |
| 38963_i_at | U12707   | WAS      |
| 32116_at   | AB002405 | TMC6     |
| 32081_at   | AB023166 | CIT      |
| 34178_at   | A1884738 | ZBTB22   |
| 33254_at   | AF008915 | EVI5     |
| 36028_at   | U45285   | TCIRG1   |
| 36814_at   | AB029032 | KIAA1109 |
| 41767_r_at | AB020662 | GOLGA8A  |
| 35842_at   | AL049265 | IL6ST    |
| 36093_at   | AB014514 | FLJ30092 |
| 40886_at   | M29548   | EEF1A1   |
| 40599_at   | AL109669 | IL16     |
| 40641_at   | AF038362 | BTAF1    |
| 1999_s_at  | U19775   | MAPK14   |

**Supplemental Table 1: List of 1428 Core Genes**

|            |               |          |
|------------|---------------|----------|
| 1842_at    | HG2724-HT2820 | NA       |
| 1556_at    | U23946        | RBM5     |
| 1165_at    | D49950        | IL18     |
| 817_at     | U72209        | YAF2     |
| 676_g_at   | J04164        | IFITM1   |
| 39436_at   | AF079221      | BNIP3L   |
| 36582_g_at | U09510        | GARS     |
| 36631_at   | D49396        | PRDX3    |
| 39777_at   | AF075587      | MYCBP2   |
| 37668_at   | M69039        | C1QBP    |
| 34649_at   | M14219        | SSR1     |
| 33247_at   | U86782        | PSMD14   |
| 34716_at   | AF067730      | FUSIP1   |
| 40821_at   | M61832        | AHCY     |
| 36614_at   | X87949        | HSPA5    |
| 41488_at   | AC002394      | LYRM1    |
| 33214_at   | Y11681        | MRPS12   |
| 32124_at   | AL030996      | THOC2    |
| 32129_at   | AL079314      | ZNF364   |
| 32230_at   | U39067        | EIF3I    |
| 36206_at   | L31801        | SLC16A1  |
| 36592_at   | S85655        | PHB      |
| 40647_at   | Z32684        | XK       |
| 35631_at   | U37689        | POLR2H   |
| 36909_at   | X62048        | WEE1     |
| 34828_at   | AL037557      | POLR2I   |
| 36620_at   | X02317        | SOD1     |
| 37696_at   | L06328        | VDAC2    |
| 37694_at   | D87685        | PHF3     |
| 41829_at   | AB018274      | LARP1    |
| 1635_at    | U07563        | ABL1     |
| 260_at     | M16447        | QDPR     |
| 41403_at   | AI032612      | SNRPF    |
| 34773_at   | AF038952      | TBCA     |
| 36553_at   | AA669799      | ASMTL    |
| 32850_at   | Z25535        | NUP153   |
| 32853_at   | AB018262      | TOMM70A  |
| 33424_at   | Y00281        | RPN1     |
| 33932_at   | X17644        | GSPT1    |
| 34839_at   | AB029027      | PITRM1   |
| 38082_at   | AB014550      | SMCHD1   |
| 33123_at   | L10379        | THAP11   |
| 32734_at   | L76703        | PPP2R5E  |
| 33767_at   | X15306        | NEFH     |
| 36457_at   | U10860        | GMPS     |
| 33877_s_at | AB028990      | EXOC7    |
| 35761_at   | AL050073      | AASDHPPT |
| 37313_at   | U80017        | SMN1     |
| 37752_at   | M15353        | EIF4E    |
| 2086_s_at  | D17517        | TYRO3    |
| 1798_at    | U41060        | SLC39A6  |

**Supplemental Table 1: List of 1428 Core Genes**

|            |               |          |
|------------|---------------|----------|
| 36802_at   | M23197        | CD33     |
| 37415_at   | AB018258      | ATP10B   |
| 39298_at   | AB022918      | ST3GAL6  |
| 41400_at   | K02581        | TK1      |
| 41430_at   | AB011113      | WDR7     |
| 34226_at   | U77129        | MAP4K5   |
| 34757_at   | AA595596      | PARP2    |
| 36068_at   | AF002210      | CCS      |
| 36863_at   | AF032862      | HMMR     |
| 37915_at   | AL080173      | BAZ2B    |
| 38265_at   | AI538172      | RBBP6    |
| 38290_at   | AF037195      | RGS14    |
| 38976_at   | D44497        | CORO1A   |
| 39082_at   | D00510        | ANXA6    |
| 39420_at   | S62138        | FUS      |
| 40149_at   | AL049924      | SH2B1    |
| 40873_at   | D86963        | DVL3     |
| 32174_at   | AF015926      | SLC9A3R1 |
| 32254_at   | AL050223      | VAMP2    |
| 32833_at   | M59287        | CLK1     |
| 32834_r_at | AF013591      | RIOK3    |
| 36675_r_at | J03191        | PFN1     |
| 37026_at   | U44975        | KLF6     |
| 39133_at   | AI525379      | BLOC1S1  |
| 39891_at   | AI246730      | ZNF710   |
| 39873_at   | X66360        | PCTK2    |
| 40915_r_at | Y00272        | CDC2     |
| 41598_at   | AA890010      | SEC22B   |
| 1386_at    | M83738        | PTPN9    |
| 1341_at    | X52056        | SPI1     |
| 1164_at    | HG3344-HT3521 | NA       |
| 603_at     | M29960        | NR2C1    |
| 558_at     | M98776        | KRT1     |
| 487_g_at   | U60521        | CASP9    |
| 349_g_at   | D14678        | KIFC1    |
| 32034_at   | AF041259      | ZNF217   |
| 39269_at   | L07541        | RFC3     |
| 32046_at   | D10495        | PRKCD    |
| 34811_at   | U09813        | ATP5G3   |
| 41735_at   | AI808958      | DENND3   |
| 36185_at   | D32050        | AARS     |
| 34460_at   | AB014512      | BZRAP1   |
| 41147_at   | AF038186      | ISCA1    |
| 32227_at   | X17042        | SRGN     |
| 37350_at   | AL031177      | PSMD10   |
| 31801_at   | AI808712      | TMF1     |
| 36898_r_at | X74331        | PRIM2    |
| 34327_at   | Z46606        | HLTF     |
| 36962_at   | U24105        | COPA     |
| 34402_at   | AB024327      | STRAP    |
| 41606_at   | AJ005940      | DRG1     |

**Supplemental Table 1: List of 1428 Core Genes**

|            |          |          |
|------------|----------|----------|
| 34879_at   | AF007875 | DPM1     |
| 35256_at   | AL096737 | SLC5A6   |
| 1990_g_at  | U43746   | BRCA2    |
| 193_at     | U21858   | TAF9     |
| 38846_at   | AA768912 | SSBP1    |
| 39806_at   | AL050261 | ASF1A    |
| 1721_g_at  | U65410   | MAD2L1   |
| 1161_at    | J04988   | HSP90AB1 |
| 39329_at   | X15804   | ACTN1    |
| 41733_at   | AC003007 | CTNNB1   |
| 36188_at   | D32257   | GTF3A    |
| 37403_at   | X05908   | ANXA1    |
| 38814_at   | AF038954 | ATP6V1G1 |
| 38462_at   | U64028   | NDUFA5   |
| 34651_at   | M58525   | COMT     |
| 35916_s_at | AA877215 | HNRPA3   |
| 37844_at   | AI263885 | IL27RA   |
| 41632_at   | D38550   | E2F3     |
| 32695_at   | Z97632   | HTATSF1  |
| 36510_at   | X16901   | GTF2F2   |
| 38712_at   | AL035291 | C1orf9   |
| 40074_at   | X16396   | MTHFD2   |
| 34857_at   | Z24724   | ATP13A3  |
| 35300_at   | X54326   | EPRS     |
| 37663_at   | X70649   | DDX1     |
| 38797_at   | D31887   | SLC39A14 |
| 1248_at    | U37689   | POLR2H   |
| 262_at     | M21154   | AMD1     |
| 34718_at   | X04434   | IGF1R    |
| 40774_at   | X74801   | CCT3     |
| 34798_at   | Z35491   | BAG1     |
| 39884_g_at | AF091078 | DIMT1L   |
| 34427_g_at | AF073485 | MR1      |
| 35431_g_at | U78082   | MED6     |
| 35905_s_at | U34995   | GAPDH    |
| 35924_at   | AI955897 | INPP4A   |
| 36224_g_at | AI809970 | SFPQ     |
| 37425_g_at | AB029343 | CCHCR1   |
| 37826_at   | AF020761 | UBE2D1   |
| 38223_at   | AB024057 | TBC1D8   |
| 38547_at   | Y00796   | ITGAL    |
| 38558_at   | M29273   | MAG      |
| 32033_at   | AL096780 | CHKB     |
| 32079_at   | AB014539 | KIF13B   |
| 32133_at   | AB011161 | PIP5K1C  |
| 32632_g_at | J03060   | GBA      |
| 32713_at   | U51587   | GOLGA1   |
| 33788_at   | AB002390 | ENTPD4   |
| 34690_at   | U66616   | SMARCC2  |
| 35166_at   | D87343   | DSCR3    |
| 36034_at   | D87447   | KIAA0258 |



**Supplemental Table 1: List of 1428 Core Genes**

|            |               |           |
|------------|---------------|-----------|
| 36839_at   | U77949        | CDC6      |
| 37209_g_at | AJ001612      | PSPHL     |
| 37544_at   | X64318        | NFIL3     |
| 39034_at   | AL080122      | CHMP2B    |
| 39339_at   | AB018335      | TMEM63A   |
| 40458_at   | U43185        | STAT5A    |
| 40783_s_at | L36151        | PI4KA     |
| 39705_at   | AB014600      | SIN3B     |
| 40064_at   | AB011121      | TRAK2     |
| 40817_at   | M96824        | NUCB1     |
| 40877_s_at | AF041080      | HERC2P2   |
| 41745_at   | X57352        | IFITM3    |
| 32145_at   | X58141        | ADD1      |
| 35363_at   | AL080113      | DDX17     |
| 34801_at   | AB014610      | USP52     |
| 34850_at   | AB017644      | UBE2E3    |
| 35328_at   | AF055023      | NF1       |
| 36958_at   | X95735        | ZYX       |
| 37047_at   | AF002020      | NPC1      |
| 40887_g_at | M29548        | EEF1A1    |
| 39872_at   | AL031588      | GTSE1     |
| 40932_at   | H18080        | ZDHHC18   |
| 32577_s_at | L38933        | PSMC3IP   |
| 1868_g_at  | AF005775      | CFLAR     |
| 1810_s_at  | D10495        | PRKCD     |
| 1503_at    | X95152        | BRCA2     |
| 1362_s_at  | M84820        | RXRβ      |
| 1288_s_at  | J04617        | EEF1A1    |
| 1407_g_at  | M21985        | NR2C1     |
| 868_at     | U13991        | TAF10     |
| 845_at     | U16031        | STAT6     |
| 292_s_at   | HG3484-HT3678 | NA        |
| 187_at     | U07349        | MAP4K2    |
| 41855_at   | AF030424      | HAT1      |
| 32140_at   | Y08110        | SORL1     |
| 351_f_at   | D28423        | SFRS3     |
| 31869_at   | AB014540      | SWAP70    |
| 38374_at   | AF050110      | KLF10     |
| 1053_at    | M87338        | RFC2      |
| 34677_f_at | AJ012755      | LOC220594 |
| 41220_at   | AB023208      | 39700     |
| 33434_at   | AF007551      | BET1      |
| 861_g_at   | U03911        | MSH2      |
| 38148_at   | D83702        | CRY1      |
| 40634_at   | M86667        | NAPIL1    |
| 33370_r_at | U60205        | SC4MOL    |
| 33429_at   | AL050225      | C18orf10  |
| 40279_at   | D50911        | VGLL4     |
| 40962_s_at | D26155        | SMARCA2   |
| 1839_at    | HG1112-HT1112 | NA        |
| 549_at     | S80343        | RARS      |

**Supplemental Table 1: List of 1428 Core Genes**

|            |               |           |
|------------|---------------|-----------|
| 34763_at   | AF020043      | SMC3      |
| 39396_at   | AF081281      | LYPLA1    |
| 40866_at   | AJ001258      | NIPSNAP1  |
| 1448_at    | D00762        | PSMA3     |
| 604_at     | L78833        | BRCA1     |
| 34099_f_at | W26056        | NAP1L1    |
| 37250_at   | AB007191      | MYCBP     |
| 38702_at   | AF070640      | POLE3     |
| 39731_at   | Z23064        | RBMX      |
| 37009_at   | AL035079      | CAT       |
| 40789_at   | U54645        | AK2       |
| 32194_at   | M37197        | CEBPZ     |
| 35759_at   | AF026166      | CCT2      |
| 35836_at   | AB019408      | NUDC      |
| 37302_at   | U30872        | CENPF     |
| 37666_at   | D29011        | PSMB5     |
| 39561_at   | AL008583      | CBX6      |
| 1630_s_at  | HG3730-HT4000 | NA        |
| 357_at     | AF000430      | DNM1L     |
| 37825_at   | M84443        | GALK2     |
| 35614_at   | AB012124      | TCFL5     |
| 38703_at   | AF005050      | DNPEP     |
| 34848_at   | X69141        | FDFT1     |
| 38019_at   | L37043        | CSNK1E    |
| 38450_at   | X69804        | SSB       |
| 38804_at   | U33286        | CSE1L     |
| 34417_at   | AL049437      | DPY19L2P2 |
| 37143_s_at | AB002359      | PFAS      |
| 37884_f_at | AI375033      | C2orf27   |
| 37935_at   | AF016369      | PRPF4     |
| 40133_s_at | W28944        | GRHPR     |
| 40816_at   | L07758        | PWP1      |
| 34411_at   | Y10387        | PAPSS1    |
| 38394_at   | D42047        | GPD1L     |
| 32544_s_at | L12535        | RSU1      |
| 1924_at    | U11791        | CCNH      |
| 1154_at    | J02645        | EIF2S1    |
| 1138_at    | L20859        | SLC20A1   |
| 31957_r_at | M17886        | RPLP1     |
| 32007_at   | W29045        | NA        |
| 34568_at   | X82634        | KRT33B    |
| 35083_at   | M10119        | FTL       |
| 35534_at   | AB011086      | GPRIN2    |
| 36437_s_at | AF064606      | RANBP9    |
| 32315_at   | U12202        | RPS24     |
| 32318_s_at | AB004047      | ACTB      |
| 32980_f_at | AI688098      | HIST1H2BG |
| 34033_s_at | U82278        | LILRA2    |
| 36216_at   | AF065485      | SNX4      |
| 36784_at   | J03071        | CSHL1     |
| 36795_at   | J03077        | PSAP      |

**Supplemental Table 1: List of 1428 Core Genes**

|            |          |               |
|------------|----------|---------------|
| 36808_at   | AF001846 | PTPN22        |
| 37442_at   | AL050378 | DKFZp586I1420 |
| 37098_at   | D38537   | PPOX          |
| 37106_at   | D89928   | ZNF354A       |
| 37411_at   | D30758   | CENTB1        |
| 38158_at   | D79987   | ESPL1         |
| 38863_at   | L07540   | RFC5          |
| 39267_at   | AF102265 | PGM3          |
| 39968_at   | U50136   | LTC4S         |
| 41404_at   | AJ010119 | RPS6KA4       |
| 41443_at   | U63127   | PSD4          |
| 41614_at   | AB014608 | PARC          |
| 41643_at   | X83301   | SMA5          |
| 32673_at   | U90543   | BTN2A1        |
| 33269_at   | AB003723 | PIGQ          |
| 33296_at   | AB020643 | GLCE          |
| 33761_s_at | AB007962 | FAM91A2       |
| 35170_at   | AF044414 | MAN2C1        |
| 36066_at   | AB020635 | KIAA0828      |
| 37556_at   | M81637   | GCA           |
| 38259_at   | AB002559 | STXBP2        |
| 38278_at   | M62324   | ARID5A        |
| 38668_at   | AB011125 | GPATCH8       |
| 39725_at   | L10910   | RBM39         |
| 39379_at   | AL049397 | C1orf121      |
| 40071_at   | U03688   | CYP1B1        |
| 40132_g_at | D89937   | FSTL1         |
| 41222_at   | AF067575 | STAT6         |
| 41231_f_at | X13546   | HMG2N2        |
| 32208_at   | AB002353 | KIAA0355      |
| 32237_at   | D87454   | KIAA0265      |
| 32259_at   | AB002386 | EZH1          |
| 33339_g_at | M97936   | STAT1         |
| 32801_at   | AB002315 | KIAA0317      |
| 34365_at   | AF042386 | PPIE          |
| 36949_at   | U29171   | CSNK1D        |
| 36598_s_at | L36818   | INPPL1        |
| 36996_at   | U41635   | OS9           |
| 37024_at   | AF010312 | LITAF         |
| 37410_at   | AJ224358 | MED22         |
| 38069_at   | Z67743   | CLCN7         |
| 39140_at   | AL079292 | DHX29         |
| 39864_at   | D78134   | CIRBP         |
| 39865_at   | A1890903 | KCTD7         |
| 40555_at   | M31470   | RHOQ          |
| 41588_at   | AA022949 | FGF18         |
| 32540_at   | A1762547 | PPP3CC        |
| 32599_at   | AF013168 | TSC1          |
| 33188_at   | U37221   | PPIL2         |
| 2044_s_at  | M15400   | RB1           |
| 1917_at    | X03484   | RAF1          |

**Supplemental Table 1: List of 1428 Core Genes**

|            |               |          |
|------------|---------------|----------|
| 1119_at    | J05249        | RPA2     |
| 1054_at    | M87339        | RFC4     |
| 940_g_at   | D12625        | NF1      |
| 904_s_at   | L47276        | TOP2A    |
| 329_s_at   | HG2238-HT2321 | NA       |
| 721_g_at   | D87673        | HSF4     |
| 467_at     | U63717        | OSTF1    |
| 359_at     | Y10659        | IL13RA1  |
| 282_at     | L16782        | MPHOSPH1 |
| 157_at     | U65011        | PRAME    |
| 34878_at   | AB019987      | SMC4     |
| 276_at     | L08069        | DNAJA1   |
| 665_at     | L20321        | NEK4     |
| 34648_at   | Z12830        | SSR1     |
| 32617_at   | W74442        | FANCI    |
| 39232_at   | U09284        | LIMS1    |
| 33863_at   | U65785        | HYOU1    |
| 39643_at   | U94703        | POLG2    |
| 41718_g_at | AC004770      | FADS1    |
| 34723_at   | U79270        | COX11    |
| 32790_at   | D59253        | NCBP2    |
| 36122_at   | X59417        | PSMA6    |
| 38050_at   | D79986        | BCLAF1   |
| 40957_at   | D63881        | SUZ12    |
| 1877_g_at  | HG1103-HT1103 | NA       |
| 39600_at   | AL080110      | PAQR3    |
| 41060_at   | M73812        | CCNE1    |
| 32096_at   | AC005546      | TRMT1    |
| 40778_at   | AF035555      | HSD17B10 |
| 38732_at   | X91788        | CLNS1A   |
| 1313_at    | D38048        | PSMB7    |
| 981_at     | X74794        | MCM4     |
| 31608_g_at | AJ002428      | VDAC1    |
| 38849_at   | AF038966      | SCAMP1   |
| 36017_at   | AF055016      | C13orf1  |
| 35699_at   | AF046918      | BUB1B    |
| 37966_at   | AA187563      | PARVB    |
| 39755_at   | Z93930        | XBP1     |
| 40419_at   | X85116        | STOM     |
| 36639_at   | AF067853      | ADSL     |
| 37334_at   | U23803        | HNRNPA0  |
| 38744_at   | N95406        | SHFM1    |
| 1644_at    | U36764        | EIF3I    |
| 33632_g_at | AF023612      | TXNL4A   |
| 36502_at   | AB020641      | PFTK1    |
| 37244_at   | AA746355      | UCHL3    |
| 38675_at   | M18465        | SNRPC    |
| 40111_g_at | U49283        | IDH3B    |
| 41146_at   | J03473        | PARP1    |
| 33819_at   | X13794        | LDHB     |
| 33912_at   | Y13834        | ZMPSTE24 |

**Supplemental Table 1: List of 1428 Core Genes**

|            |          |          |
|------------|----------|----------|
| 34344_at   | AF044195 | IKBKAP   |
| 35323_at   | U78525   | EIF3B    |
| 36604_at   | D83004   | UBE2N    |
| 36658_at   | D13643   | DHCR24   |
| 37016_at   | D13900   | ECHS1    |
| 39844_at   | AI806379 | LSM12    |
| 35039_at   | D87466   | DCUN1D4  |
| 39658_at   | AB007901 | ZBTB24   |
| 40348_s_at | W25866   | ANP32E   |
| 31883_at   | AF025794 | MTRR     |
| 34270_at   | AJ238097 | LSM5     |
| 38986_at   | D83485   | PDIA3    |
| 39693_at   | N53547   | TMEM109  |
| 41722_at   | U40490   | NNT      |
| 40852_at   | AB025254 | TDRD7    |
| 32241_at   | AL050265 | TARDBP   |
| 34349_at   | AJ011779 | SEC63    |
| 36128_at   | L40397   | TMED10   |
| 36602_at   | D21064   | PMPCA    |
| 37673_at   | X96586   | NSMAF    |
| 38385_at   | S65738   | DSTN     |
| 40576_f_at | D89678   | HNRPDL   |
| 41320_s_at | U69609   | LRRFIP1  |
| 32530_at   | X56468   | YWHAQ    |
| 630_at     | L39874   | DCTD     |
| 32883_at   | X77744   | ZNF160   |
| 33484_at   | Y10571   | RNF2     |
| 35413_s_at | M77172   | ZNF22    |
| 40000_f_at | AB023203 | VPS13A   |
| 40454_at   | X87241   | FAT      |
| 39367_at   | AA522537 | ELAC2    |
| 40859_at   | AI561196 | ZC3H14   |
| 31961_r_at | AF070579 | NA       |
| 31584_at   | X16064   | TPT1     |
| 31673_s_at | X65784   | NA       |
| 35017_f_at | M80470   | HLA-G    |
| 36332_at   | U40391   | AANAT    |
| 33994_g_at | M22919   | MYL6     |
| 35450_s_at | U77948   | GTF2I    |
| 36279_at   | AB011128 | KIAA0556 |
| 34532_at   | AF035318 | CUGBP2   |
| 36692_at   | AF052099 | MTMR9    |
| 38181_at   | X57766   | MMP11    |
| 38603_at   | U09367   | ZNF136   |
| 37146_at   | AB007864 | ATG2A    |
| 37421_f_at | X17093   | HLA-F    |
| 37424_at   | AB029343 | CCHCR1   |
| 37450_r_at | X04409   | GNAS     |
| 37524_at   | AB011421 | STK17B   |
| 37855_at   | M95767   | CTBS     |
| 38893_at   | AL008637 | NCF4     |

**Supplemental Table 1: List of 1428 Core Genes**

|            |          |          |
|------------|----------|----------|
| 38920_at   | AF016582 | CHEK1    |
| 39224_at   | AB011152 | CENTD1   |
| 39261_at   | L16896   | ZBTB48   |
| 40308_at   | AI830496 | ATAD2B   |
| 41669_at   | D83776   | ZCCHC11  |
| 41399_at   | AB029034 | PHF8     |
| 41621_i_at | X78924   | ZNF266   |
| 41640_at   | AL031427 | YIPF1    |
| 41698_at   | AL031685 | SLC9A8   |
| 41702_r_at | U93869   | POLR3F   |
| 34215_at   | L03426   | SFRS17A  |
| 34699_at   | AL050105 | CD2AP    |
| 33705_at   | L20971   | PDE4B    |
| 33774_at   | X98172   | CASP8    |
| 34292_at   | X92475   | TMEM187  |
| 34660_at   | U64998   | RNASE6   |
| 34713_at   | AB002357 | KIF3B    |
| 34761_r_at | U41766   | ADAM9    |
| 35645_at   | AL050148 | SNX1     |
| 36076_g_at | AL037167 | RABL4    |
| 36529_at   | AI885381 | TRAPPC6A |
| 35209_at   | AB018309 | EPM2AIP1 |
| 37238_s_at | AF014118 | PKMYT1   |
| 36901_at   | L01042   | TMF1     |
| 38710_at   | AL096714 | OTUB1    |
| 38649_at   | AB023187 | FNDC3A   |
| 39043_at   | AF006084 | ARPC1B   |
| 40453_s_at | U30826   | SFRS5    |
| 39373_at   | AF035284 | FADS1    |
| 39403_at   | AB014578 | DNAJC13  |
| 39742_at   | U59863   | TANK     |
| 40068_at   | U26648   | STX5     |
| 40494_at   | AF043733 | DEDD     |
| 41137_at   | AB007972 | PPP1R12B |
| 41239_r_at | M90696   | CTSS     |
| 32202_at   | U67322   | RBCK1    |
| 32209_at   | AF052151 | FAM89B   |
| 32218_at   | AF034176 | NA       |
| 32245_at   | AF014837 | METTL3   |
| 33822_at   | Z14229   | NUMA1    |
| 33349_at   | AL049378 | TNPO1    |
| 33444_at   | D30756   | NBR1     |
| 33848_r_at | U10906   | CDKN1B   |
| 34367_at   | AF006043 | PHGDH    |
| 34812_at   | W26099   | GORASP1  |
| 36115_at   | L29217   | CLK3     |
| 36940_at   | D86970   | MYO18A   |
| 36184_at   | L06419   | PLOD1    |
| 36211_at   | D87461   | BCL2L2   |
| 37033_s_at | X13710   | GPX1     |
| 37763_at   | AL031228 | RXRβ     |

**Supplemental Table 1: List of 1428 Core Genes**

|            |               |               |
|------------|---------------|---------------|
| 39103_s_at | H98552        | DHRS1         |
| 39130_at   | AB018313      | VPS39         |
| 40182_s_at | AF055027      | CARM1         |
| 41264_at   | AL050172      | RBM4B         |
| 41274_at   | AA908993      | DKFZp667G2110 |
| 41282_s_at | AA194159      | PEX10         |
| 41292_at   | L22009        | HNRPH1        |
| 33205_at   | AF064804      | SUPT3H        |
| 1612_s_at  | X56681        | JUND          |
| 1497_at    | L04270        | LTBR          |
| 1318_at    | X74262        | RBBP4         |
| 330_s_at   | HG2259-HT2348 | NA            |
| 594_s_at   | M55265        | CSNK2A1       |
| 507_s_at   | U43189        | ELF2          |
| 510_g_at   | U44378        | SMAD4         |
| 240_at     | M64231        | SRM           |
| 37902_at   | L13278        | CRYZ          |
| 38090_at   | AL050371      | PISD          |
| 38774_at   | U77942        | STX7          |
| 41579_s_at | AI952267      | PRKCI         |
| 651_at     | L07493        | RPA3          |
| 37493_at   | H04668        | CSF2RB        |
| 32635_at   | AB029036      | TRIM33        |
| 36636_at   | M12267        | OAT           |
| 34684_at   | L36140        | RECQL         |
| 34736_at   | M25753        | CCNB1         |
| 35227_at   | U72066        | RBBP8         |
| 1659_s_at  | D78132        | RHEB          |
| 1446_at    | D00760        | PSMA2         |
| 36015_at   | N30625        | APITD1        |
| 36873_at   | D16532        | VLDLR         |
| 32780_at   | AB018271      | DST           |
| 39142_at   | AJ001810      | NUDT21        |
| 39162_at   | AA156987      | GTF2H5        |
| 32954_at   | U79263        | RIF1          |
| 34188_at   | AF070606      | ATP2B1        |
| 39730_at   | X16416        | ABL1          |
| 32745_at   | AF034091      | MRPL40        |
| 33456_at   | U24166        | MAPRE1        |
| 36100_at   | AF022375      | VEGFA         |
| 36633_at   | AA114830      | AKAP10        |
| 37728_r_at | X78669        | RCN2          |
| 1809_at    | AB003698      | CDC7          |
| 958_s_at   | HG2274-HT2370 | NA            |
| 41393_at   | AF003540      | ZNF195        |
| 39020_at   | U82938        | SIVA1         |
| 33423_g_at | AF052155      | SEC13         |
| 33879_at   | U79528        | OPRS1         |
| 33906_at   | AB001740      | SSSCA1        |
| 35812_at   | AJ133769      | TNPO3         |
| 36581_at   | U09510        | GARS          |

**Supplemental Table 1: List of 1428 Core Genes**

|            |               |          |
|------------|---------------|----------|
| 36684_at   | M21154        | AMD1     |
| 36687_at   | N50520        | COX7B    |
| 38405_at   | U25165        | FXR1     |
| 32615_at   | J05032        | DARS     |
| 960_g_at   | HG2463-HT2559 | NA       |
| 36235_at   | W26334        | NFE2L2   |
| 40758_at   | X81788        | ICT1     |
| 35991_at   | AA917945      | LSM6     |
| 36885_at   | L28824        | SYK      |
| 40509_at   | J04058        | ETFA     |
| 40788_at   | U84371        | AK2      |
| 40810_at   | U66615        | SMARCC1  |
| 32774_at   | A1541050      | NDUFB8   |
| 41776_at   | U70660        | ATOX1    |
| 34790_at   | S70154        | ACAT2    |
| 36688_at   | U11313        | SCP2     |
| 37358_at   | AI039880      | UBE2E1   |
| 38097_at   | AF010313      | EI24     |
| 38123_at   | D14878        | CDC123   |
| 40976_at   | AF052432      | KATNB1   |
| 32546_at   | U59309        | FH       |
| 1789_at    | U65928        | COP5     |
| 1516_g_at  | HG4074-HT4344 | NA       |
| 584_s_at   | M30938        | XRCC5    |
| 229_at     | M37197        | CEBPZ    |
| 37508_f_at | AA675900      | PRPF40A  |
| 33315_at   | M29204        | C2orf3   |
| 39710_at   | U30521        | C5orf13  |
| 40516_at   | L19872        | AHR      |
| 33881_at   | AA977580      | ACSL3    |
| 35793_at   | AB014560      | G3BP2    |
| 35848_at   | AL049432      | ZMIZ1    |
| 36187_at   | M36717        | RNH1     |
| 36189_at   | U10323        | ILF2     |
| 36195_at   | U07681        | IDH3A    |
| 36610_at   | D21852        | R3HDM1   |
| 1073_at    | M81601        | TCEA1    |
| 633_s_at   | L40386        | TFDP2    |
| 33666_at   | M16342        | HNRNPC   |
| 36489_at   | D00860        | PRPS1    |
| 36864_at   | AJ001625      | PEX3     |
| 39380_at   | AB014597      | ANKRD17  |
| 41128_at   | AF070537      | TMEM183A |
| 41241_at   | D84273        | NARS     |
| 41162_at   | Y13936        | PPM1G    |
| 32841_at   | U19765        | CNBP     |
| 35750_at   | AL049948      | ZC3H15   |
| 35294_at   | M25077        | TROVE2   |
| 36599_at   | M55905        | ME2      |
| 38073_at   | AB007858      | RNMT     |
| 38821_at   | AJ002030      | PGRMC2   |



**Supplemental Table 1: List of 1428 Core Genes**

|            |          |          |
|------------|----------|----------|
| 39086_g_at | AA768912 | SSBP1    |
| 39110_at   | X55733   | EIF4B    |
| 40618_at   | H15872   | CDV3     |
| 41557_at   | D29641   | SKIV2L2  |
| 32536_at   | Z37986   | EBP      |
| 32595_at   | U07231   | GRSF1    |
| 1643_g_at  | U35113   | MTA1     |
| 1633_g_at  | U77735   | PIM2     |
| 1550_at    | U19796   | MRPL28   |
| 37828_at   | AL050064 | RSBN1    |
| 38505_at   | AL050151 | EIF2C2   |
| 33734_at   | AL022398 | C1orf107 |
| 39745_at   | AB011139 | OPA1     |
| 41201_at   | AF000430 | DNM1L    |
| 32846_s_at | D13629   | KTN1     |
| 34814_at   | AL041443 | SAE2     |
| 36177_at   | X78627   | TSN      |
| 37697_s_at | L08666   | VDAC2    |
| 37707_i_at | M81118   | ADH5     |
| 31962_at   | L06499   | RPL37A   |
| 31596_f_at | L02326   | LOC91316 |
| 31695_g_at | X82877   | RSC1A1   |
| 32429_f_at | X68688   | ZNF33B   |
| 33601_at   | AF052145 | ZNF804A  |
| 33656_at   | D23661   | RPL37    |
| 33683_at   | D50525   | TI-227H  |
| 34573_at   | U14187   | EFNA3    |
| 34593_g_at | M13932   | RPS17    |
| 32272_at   | K00558   | TUBA1B   |
| 36403_s_at | AI434146 | ZNF101   |
| 34005_at   | X73079   | PIGR     |
| 38872_at   | U95044   | ZNF230   |
| 39262_at   | U79266   | SAC3D1   |
| 40290_f_at | L13972   | ST3GAL1  |
| 40676_at   | U37139   | ITGB3BP  |
| 40685_at   | U10868   | ALDH3B1  |
| 40724_at   | Y14443   | ZNF200   |
| 41034_s_at | U92315   | SULT2B1  |
| 32036_i_at | AF001175 | RPP14    |
| 32119_at   | AL049423 | NA       |
| 41100_at   | AB023172 | CARD8    |
| 41101_at   | D87464   | FIG4     |
| 41372_at   | AB020638 | KIAA0831 |
| 41381_at   | AB002306 | CHD9     |
| 41411_at   | AI566877 | NDUFAF1  |
| 41638_at   | D38552   | PPWD1    |
| 32045_at   | AB002331 | DIDO1    |
| 33251_at   | AB018322 | TMCC1    |
| 33281_at   | D63485   | IKBKE    |
| 34676_at   | AB029022 | CENTG2   |
| 34715_at   | U74612   | FOXMI    |

**Supplemental Table 1: List of 1428 Core Genes**

|            |          |           |
|------------|----------|-----------|
| 35233_r_at | AI056696 | CETN3     |
| 35238_at   | AB000509 | TRAF5     |
| 35252_at   | AB011100 | KIAA0528  |
| 35697_at   | L76259   | PTS       |
| 37977_at   | AI138834 | DTX2      |
| 38636_at   | AB003184 | ISLR      |
| 38700_at   | M33146   | CSRP1     |
| 37943_at   | AB002319 | ZFYVE26   |
| 37964_at   | W25793   | PCGF3     |
| 38971_r_at | AJ011896 | TNIP1     |
| 39081_at   | AI547258 | MT2A      |
| 39431_at   | AJ132583 | NPEPPS    |
| 40050_at   | AF069747 | CBFA2T2   |
| 40828_at   | D63476   | ARHGEF7   |
| 32161_at   | W26406   | LONP2     |
| 40869_at   | U50839   | RBM6      |
| 41152_f_at | T89651   | LOC729362 |
| 32178_r_at | AJ011915 | SNAP23    |
| 32197_at   | AF070548 | SLC25A11  |
| 33380_at   | AB005754 | POLS      |
| 33869_at   | AL080218 | STAT5B    |
| 33905_at   | AF072242 | MBD2      |
| 34887_at   | N92548   | RDX       |
| 35784_at   | U64520   | VAMP3     |
| 36129_at   | AB007857 | SGSM2     |
| 36591_at   | X06956   | TUBA4A    |
| 36651_at   | X15525   | ACP2      |
| 37296_at   | L28997   | ARL1      |
| 37306_at   | D38549   | CYFIP1    |
| 37676_at   | AF056490 | PDE8A     |
| 37759_at   | U51240   | LAPTM5    |
| 38120_at   | U50928   | PKD2      |
| 38447_at   | U08438   | ADRBK1    |
| 38478_at   | U08377   | SFRS8     |
| 38741_at   | U70728   | PSCD2     |
| 39105_at   | Z46389   | VASP      |
| 39153_r_at | U06632   | COIL      |
| 40549_at   | L04658   | CDK5      |
| 41554_at   | AF069291 | OSGIN2    |
| 41565_at   | AF034373 | ATXN2L    |
| 41843_r_at | W28275   | YIPF4     |
| 32578_at   | AW005997 | MLX       |
| 41525_at   | N25429   | HMG20B    |
| 32612_at   | X04412   | GSN       |
| 2021_s_at  | M73812   | CCNE1     |
| 1981_s_at  | X60287   | MAX       |
| 1833_at    | M68520   | CDK2      |
| 1673_at    | M14764   | NGFR      |
| 1494_f_at  | M33318   | CYP2A6    |
| 1370_at    | M29696   | IL7R      |
| 1326_at    | U60519   | CASP10    |

**Supplemental Table 1: List of 1428 Core Genes**

|             |               |          |
|-------------|---------------|----------|
| 1327_s_at   | U67156        | MAP3K5   |
| 1308_g_at   | D14533        | XPA      |
| 1224_at     | X66363        | PCTK1    |
| 826_at      | U50553        | DDX3X    |
| 1127_at     | L07597        | RPS6KA1  |
| 1131_at     | L11285        | MAP2K2   |
| 1064_at     | U02680        | TWF1     |
| 980_at      | AF002020      | NPC1     |
| 920_at      | HG846-HT846   | NA       |
| 906_at      | L78440        | STAT4    |
| 706_at      | HG4582-HT4987 | NA       |
| 646_s_at    | L29218        | CLK2     |
| 344_s_at    | D13146        | CNP      |
| 327_f_at    | HG1800-HT1823 | NA       |
| 228_at      | M35416        | RALB     |
| 179_at      | U38980        | PMS2L11  |
| 143_s_at    | U75309        | TAF5     |
| 160044_g_at | NM_001098     | ACO2     |
| 38984_at    | AB007896      | PREPL    |
| 40002_r_at  | AI935442      | VPS13A   |
| 31488_s_at  | S81916        | PGK1     |
| 40355_at    | AJ006266      | WDHD1    |
| 1310_at     | D26599        | PSMB2    |
| 798_at      | X74330        | PRIM1    |
| 224_at      | S81439        | KLF10    |
| 32849_at    | D80000        | SMC1A    |
| 32808_at    | X07979        | ITGB1    |
| 36163_at    | L13761        | DLD      |
| 652_g_at    | L07493        | RPA3     |
| 36535_at    | U04209        | MFAP1    |
| 37584_at    | AJ007669      | FANCG    |
| 37585_at    | X13482        | SNRPA1   |
| 37561_at    | AL031778      | NFYA     |
| 37610_at    | AI765280      | C7orf44  |
| 38689_at    | AL021937      | C22orf28 |
| 39790_at    | M23115        | ATP2A2   |
| 40117_at    | D84557        | MCM6     |
| 32159_at    | L00049        | KRAS     |
| 41142_at    | U62961        | OXCT1    |
| 41778_at    | U53347        | SLC1A5   |
| 1953_at     | AF024710      | VEGFA    |
| 1544_at     | U39817        | BLM      |
| 33631_at    | AF023612      | TXNL4A   |
| 32336_at    | X05236        | ALDOA    |
| 41010_at    | Y17829        | HOMER1   |
| 41436_at    | AJ224901      | ZMYM2    |
| 36565_at    | X98253        | RNF113A  |
| 38720_at    | AF026292      | CCT7     |
| 38981_at    | AA203354      | NDUFB3   |
| 39727_at    | AF023917      | DUSP11   |
| 40150_at    | AA205857      | SNRPD3   |

**Supplemental Table 1: List of 1428 Core Genes**

|            |          |          |
|------------|----------|----------|
| 35823_at   | M63573   | PPIB     |
| 36102_at   | AF038962 | VDAC3    |
| 36099_at   | M69040   | SFRS1    |
| 37000_at   | AL035304 | BRP44    |
| 39169_at   | AF054184 | SEC61G   |
| 32564_at   | AA083129 | SEC61B   |
| 2035_s_at  | M55914   | ENO1     |
| 452_at     | U66615   | SMARCC1  |
| 41407_at   | L03411   | RDBP     |
| 33710_at   | U72515   | MBOAT5   |
| 33795_at   | AB006630 | TCF20    |
| 35140_at   | R59697   | CDK8     |
| 35232_f_at | AI056696 | CETN3    |
| 36554_at   | Y15521   | ASMTL    |
| 41732_at   | AA310786 | BOLA2    |
| 34340_at   | AA173896 | CYB5B    |
| 37029_at   | X83218   | ATP5O    |
| 37359_at   | D14658   | SPCS2    |
| 37739_at   | M86737   | SSRP1    |
| 38413_at   | D15057   | DAD1     |
| 39108_at   | U22526   | LSS      |
| 39113_at   | AI262789 | PDIA4    |
| 41248_at   | AB014589 | CSTF2T   |
| 32584_at   | D38047   | PSMD8    |
| 1449_at    | D00763   | PSMA4    |
| 33658_at   | S54641   | ZNF124   |
| 38155_at   | U92538   | ORC5L    |
| 41667_s_at | AJ006068 | TGDS     |
| 31847_at   | X59131   | USPL1    |
| 41646_at   | AA576724 | TAOK3    |
| 32044_at   | D13635   | UBE3C    |
| 32086_at   | U66561   | ZNF184   |
| 38256_s_at | W21827   | NGDN     |
| 38667_at   | AA189161 | GLOD4    |
| 40417_at   | D43950   | CCT5     |
| 32236_at   | AF032456 | UBE2G2   |
| 32766_at   | Z83840   | XRCC6    |
| 32785_at   | D50929   | EIF3A    |
| 36107_at   | AA845575 | ATP5J    |
| 36145_at   | U51586   | PUF60    |
| 37389_at   | U51678   | C11orf58 |
| 38410_at   | X72964   | CETN2    |
| 38765_at   | AB028449 | DICER1   |
| 39921_at   | AI526089 | COX5B    |
| 40250_at   | U55766   | KRR1     |
| 41574_at   | Y09703   | PNN      |
| 1450_g_at  | D00763   | PSMA4    |
| 37882_at   | X63468   | GTF2E1   |
| 40754_at   | Z30093   | GTF2H3   |
| 36500_at   | AF027974 | NSDHL    |
| 39390_at   | AF052123 | NUP133   |

**Supplemental Table 1: List of 1428 Core Genes**

|            |               |           |
|------------|---------------|-----------|
| 40881_at   | X64330        | ACLY      |
| 41122_at   | AB011173      | AOF2      |
| 40868_at   | AA442799      | THUMPD1   |
| 41746_at   | Z83840        | NHP2L1    |
| 33422_at   | AF052155      | SEC13     |
| 34394_at   | AB018327      | ADNP      |
| 36201_at   | D13315        | GLO1      |
| 36588_at   | AB018353      | UNC84A    |
| 40984_at   | W28255        | 76P       |
| 1640_at    | U17714        | ST13      |
| 41099_at   | X84740        | LIG3      |
| 34706_at   | AB011090      | MGA       |
| 35229_at   | L39211        | CPT1A     |
| 37555_at   | X95263        | PWP2      |
| 32851_at   | AF036956      | CUGBP2    |
| 33893_r_at | AB007939      | CEP170    |
| 37044_at   | D49490        | PDIA5     |
| 38011_at   | AB006572      | C19orf2   |
| 39152_f_at | U06632        | COIL      |
| 31923_f_at | U60269        | METTL7A   |
| 35547_at   | AF058056      | SLC16A7   |
| 32350_at   | AB026118      | MALT1     |
| 35859_f_at | U38979        | PMS2L3    |
| 35866_at   | X78926        | ZNF268    |
| 37468_at   | AF058925      | JAK2      |
| 38592_s_at | AI828210      | NA        |
| 39251_at   | M74091        | CCNC      |
| 41437_at   | AL080118      | C14orf109 |
| 36071_at   | AF070633      | IPO9      |
| 37901_at   | Y08991        | PIK3R4    |
| 38660_at   | F27891        | COX6A2    |
| 40839_at   | AL080177      | UBL3      |
| 34316_at   | W52024        | RPS15A    |
| 35348_at   | AF022116      | PRKAB1    |
| 39096_at   | AB028942      | SON       |
| 40952_at   | AA257983      | LOC730092 |
| 1163_at    | HG3254-HT3431 | NA        |
| 520_at     | U07358        | MAP3K12   |
| 230_s_at   | M54914        | FSHB      |
| 37218_at   | D64110        | BTG3      |
| 1211_s_at  | U84388        | CRADD     |
| 1178_at    | HG2846-HT2983 | NA        |
| 398_at     | X98743        | DDX18     |
| 41474_at   | Y08319        | KIF2A     |
| 37453_at   | AJ006267      | CLPX      |
| 37171_at   | X67155        | KIF23     |
| 41356_at   | W27619        | BCL11A    |
| 32638_s_at | AI610467      | SMG1      |
| 40472_at   | AF007155      | AGPAT7    |
| 40105_at   | M65131        | MUT       |
| 40893_at   | AF058953      | SUCLA2    |

**Supplemental Table 1: List of 1428 Core Genes**

|            |               |           |
|------------|---------------|-----------|
| 34253_at   | D83781        | NUP160    |
| 34659_at   | AB018334      | NUP155    |
| 834_at     | U40462        | IKZF1     |
| 38511_at   | AL109722      | ZNF529    |
| 31786_at   | AF051321      | KHDRBS3   |
| 33278_at   | AC004381      | ACSM3     |
| 35662_at   | U20536        | CASP6     |
| 40461_at   | AB007855      | ZHX3      |
| 31623_f_at | K01383        | MT1A      |
| 32065_at   | S68134        | CREM      |
| 32627_at   | AF039023      | RANBP6    |
| 37197_s_at | AL050006      | DYNC2LI1  |
| 38286_at   | AB028994      | AMOT      |
| 40113_at   | D87119        | TRIB2     |
| 41761_at   | M96954        | TIAL1     |
| 33421_s_at | AB016247      | SC5DL     |
| 38470_i_at | D86981        | APPBP2    |
| 39905_i_at | AA402332      | ARFGAP3   |
| 1876_at    | HG1103-HT1103 | NA        |
| 1264_at    | M25393        | PTPN2     |
| 579_at     | M95724        | CENPC1    |
| 1245_i_at  | U25975        | PAK2      |
| 39324_at   | AL050078      | PGAP1     |
| 40487_at   | W26634        | TRIM44    |
| 242_at     | M64571        | MAP4      |
| 32955_at   | AL021546      | TRIAP1    |
| 41029_at   | U44799        | U1SNRNPBP |
| 34717_s_at | AF047448      | FUSIP1    |
| 40440_at   | AL080119      | SERBP1    |
| 1775_at    | L24559        | POLA2     |
| 40727_at   | AL080090      | ANAPC10   |
| 34199_at   | AJ131244      | SEC24A    |
| 32676_at   | M93405        | ALDH6A1   |
| 38684_at   | AJ010953      | ATP2C1    |
| 1572_s_at  | M10051        | INSR      |
| 131_at     | X83928        | TAF11     |
| 37873_g_at | AF072468      | JRK       |
| 32087_at   | M65217        | HSF2      |
| 1565_s_at  | M96995        | GRB2      |
| 109_at     | Z97074        | RABEPK    |
| 34517_at   | L25798        | HMGCS1    |
| 41363_at   | AF027150      | SIP1      |
| 33299_at   | M37712        | NA        |
| 33796_at   | U73960        | ARL4A     |
| 38275_at   | AF054996      | IMP4      |
| 34341_at   | U00238        | PPAT      |
| 31597_r_at | L36055        | EIF4EBP1  |
| 32398_s_at | Z75190        | LRP8      |
| 36427_at   | W27129        | ANKRD40   |
| 33480_at   | X15393        | MLN       |
| 39306_at   | AF052514      | PRSS16    |

**Supplemental Table 1: List of 1428 Core Genes**

|             |          |              |
|-------------|----------|--------------|
| 41062_at    | AA037278 | PCGF1        |
| 41709_at    | AF034803 | PPFIBP2      |
| 35217_at    | AL049404 | MFAP3        |
| 36476_at    | AF016270 | BRD8         |
| 37269_at    | D38496   | LZTR1        |
| 40090_at    | AI797997 | WBSCR22      |
| 39077_at    | U41843   | DRAP1        |
| 40142_at    | Z48570   | SPA17        |
| 40439_at    | AF047469 | ASNA1        |
| 34328_s_at  | L34673   | HLTF         |
| 37380_at    | X59268   | GTF2B        |
| 39146_at    | U72936   | ATRX         |
| 39908_at    | AF069735 | TAF6L        |
| 32539_at    | U51205   | COPS8        |
| 842_at      | U48251   | ZMYND8       |
| 160042_s_at | X58431   | HOXB6        |
| 37280_at    | U59912   | SMAD1        |
| 34321_i_at  | D87120   | FAM3C        |
| 38136_at    | L76937   | WRN          |
| 36920_at    | U46024   | MTM1         |
| 35773_i_at  | AA527880 | NDUFB7       |
| 35067_at    | AI925946 | AGGF1        |
| 38150_at    | U22233   | MTAP         |
| 39299_at    | AB023188 | FASTKD2      |
| 32167_at    | AL050216 | PMPCB        |
| 36956_at    | L20852   | SLC20A2      |
| 37678_at    | U23070   | BAMBI        |
| 39546_s_at  | AA191426 | NOL7         |
| 38563_at    | AF039652 | RNASEH1      |
| 35250_at    | AL031670 | RNF24        |
| 40517_at    | AB002370 | KIAA0372     |
| 34813_at    | AL079283 | EIF1AX       |
| 36204_at    | Y00815   | PTPRF        |
| 992_at      | X52221   | ERCC2        |
| 32041_r_at  | AB007892 | CDC5L        |
| 31882_at    | AJ001340 | RRP9         |
| 32455_s_at  | U88153   | PELP1        |
| 34096_at    | AB020719 | CEP152       |
| 32338_at    | AL049980 | DKFZP564C152 |
| 37837_at    | AB020670 | ADNP2        |
| 40686_at    | AI985272 | NMB          |
| 41695_at    | AB007874 | ZBTB43       |
| 34234_f_at  | AI688640 | NKTR         |
| 35240_at    | W28983   | WDR73        |
| 32829_at    | X97544   | TIMM17A      |
| 35362_at    | AB018342 | MYO10        |
| 37382_at    | N25117   | RPS26        |
| 41328_s_at  | AL096717 | EML2         |
| 33134_at    | AB011083 | ADCY3        |
| 33180_at    | U68111   | PPP1R2       |
| 1325_at     | U59423   | SMAD1        |

**Supplemental Table 1: List of 1428 Core Genes**

|            |          |           |
|------------|----------|-----------|
| 37978_at   | D78177   | QPRT      |
| 39550_at   | AB011156 | GLT25D2   |
| 41111_at   | U68418   | BCAT2     |
| 39286_at   | D64109   | TOB2      |
| 40325_at   | AB014460 | NTHL1     |
| 34687_at   | AF052167 | MRS2L     |
| 36717_at   | AJ224162 | LIAS      |
| 37521_s_at | H82458   | ZNF330    |
| 38491_at   | U11732   | ETV6      |
| 39687_at   | A1524873 | ATXN10    |
| 33850_at   | W28892   | MAP4      |
| 41277_at   | AW021542 | SAP18     |
| 455_at     | U66618   | SMARCD2   |
| 37495_at   | U63336   | PRR3      |
| 41459_at   | M73047   | TPP2      |
| 33149_at   | U73524   | CLP1      |
| 35050_at   | X82068   | GRIA3     |
| 37466_at   | D84488   | RAB7L1    |
| 39966_at   | AF059274 | CSPG5     |
| 1072_g_at  | M77810   | GATA2     |
| 33661_at   | U66589   | RPL5      |
| 36388_at   | U47129   | PTHR2     |
| 35432_at   | AF074723 | MED6      |
| 36769_at   | X85134   | RBBP5     |
| 37491_at   | D90359   | TAF1      |
| 41380_at   | AF053003 | DPH2      |
| 38622_at   | W28953   | MTG1      |
| 38346_at   | U62767   | DUS4L     |
| 39055_at   | M32886   | SRI       |
| 39701_at   | AB006625 | PEG3      |
| 34376_at   | AB019517 | PKIG      |
| 36158_at   | AF086947 | DCTN1     |
| 39862_at   | AA528252 | POL3S     |
| 1670_at    | L23959   | TFDP1     |
| 35938_at   | M72393   | PLA2G4A   |
| 41854_at   | M13666   | MYB       |
| 40545_at   | AB018566 | PROSC     |
| 31633_g_at | Z95118   | LOC442240 |
| 34104_i_at | AI147237 | IGHG3     |
| 34510_at   | AF070552 | CDT1      |
| 38192_at   | AB014543 | CLUAP1    |
| 40654_at   | U88871   | PEX7      |
| 38788_at   | M82827   | PML       |
| 37159_at   | U79259   | AHDC1     |
| 37792_s_at | Y15572   | RAD51L3   |
| 35141_at   | Z97029   | RNASEH2A  |
| 38795_s_at | X56687   | UBTF      |
| 41672_at   | AF007128 | FBXL14    |
| 33720_at   | L48692   | PNO1      |
| 41211_at   | AB018308 | RBM12     |
| 32215_i_at | AB020685 | RHOBTB3   |



**Supplemental Table 1: List of 1428 Core Genes**

|            |          |           |
|------------|----------|-----------|
| 35091_at   | AA706226 | NRG2      |
| 35097_at   | U93163   | MAGEB2    |
| 35588_at   | AB011414 | ZNF443    |
| 33466_at   | AF038182 | C5orf30   |
| 38226_at   | W27152   | INTS10    |
| 41479_s_at | AF029670 | RAD51C    |
| 41682_s_at | U50708   | BCKDHB    |
| 31868_at   | AF060798 | STK16     |
| 40510_at   | AB007917 | HS2ST1    |
| 35345_at   | X83618   | HMGCS2    |
| 35799_at   | AL080081 | DNAJB9    |
| 37045_at   | D87443   | SNX19     |
| 38067_at   | D86957   | 39699     |
| 40238_at   | AI801872 | GPRC5B    |
| 34883_at   | D87451   | RNF10     |
| 32703_at   | Y13115   | PLK4      |
| 40562_at   | AF011499 | GNA11     |
| 36020_at   | U28831   | LOC400986 |
| 39885_at   | W87858   | KIF2A     |
| 33035_at   | AL021397 | TIPRL     |
| 34449_at   | U13022   | CASP2     |
| 33342_at   | AF039029 | SNUPN     |
| 36704_at   | AB030654 | AP4S1     |
| 37052_at   | D26135   | DGKG      |
| 35190_at   | AL031447 | THAP3     |
| 35269_at   | AF093420 | HSPBP1    |
| 1947_g_at  | M60614   | WIT1      |
| 37057_s_at | U21092   | TRAF3     |
| 35346_at   | AB007856 | FEM1B     |
| 40639_at   | AL021683 | SCO2      |
| 41559_at   | AA434319 | GRAMD1B   |
| 529_at     | U15932   | DUSP5     |
| 31614_at   | U88048   | NA        |
| 34628_at   | Y09321   | TAF4B     |
| 34731_at   | D80007   | PDCD11    |
| 1090_f_at  | M64936   | NA        |
| 31888_s_at | AF001294 | PHLDA2    |
| 40848_g_at | AB018293 | MICAL2    |
| 35293_at   | J04137   | TROVE2    |
| 40993_r_at | AF055993 | SAP30     |
| 35291_at   | AL050287 | BAG2      |
| 1983_at    | X68452   | CCND2     |
| 36796_at   | X52075   | SPN       |
| 37132_at   | AF084367 | INVS      |
| 38869_at   | AB028992 | PLCH1     |
| 33280_r_at | X80062   | ACSM3     |
| 36045_at   | AJ223948 | ASCC3     |
| 36120_at   | X63657   | FVT1      |
| 32856_at   | AB020626 | MICAL3    |
| 38453_at   | X15606   | ICAM2     |
| 33597_at   | U09411   | ZNF132    |

**Supplemental Table 1: List of 1428 Core Genes**

|            |          |           |
|------------|----------|-----------|
| 40624_at   | U48250   | OLIG2     |
| 40343_at   | AJ005814 | HOXA7     |
| 35673_at   | U02082   | ARHGEF5   |
| 31403_at   | U39905   | SLC18A1   |
| 31431_at   | U12255   | FCGRT     |
| 31432_g_at | U12255   | FCGRT     |
| 31444_s_at | M62895   | ANXA2P3   |
| 31497_at   | U19142   | GAGE1     |
| 31514_at   | AF034970 | DOK2      |
| 31523_f_at | Z80780   | HIST1H2BE |
| 31559_at   | U26209   | SLC13A2   |
| 31737_at   | M20543   | ACTA1     |
| 31934_at   | Z48614   | ADAM10    |
| 32021_at   | AI560890 | LEMD2     |
| 32405_at   | AB014607 | ACOT11    |
| 32474_at   | X96744   | PAX7      |
| 32490_at   | AC005955 | CEACAM4   |
| 33027_at   | W27906   | CTGLF1    |
| 34560_at   | Z18954   | S100A5    |
| 35116_at   | X80821   | ANKRD12   |
| 36360_at   | AB007976 | RRP15     |
| 36439_at   | AL080134 | ULK2      |
| 32888_at   | X52213   | LTK       |
| 33955_at   | M65291   | IL12A     |
| 33997_at   | AL049449 | NA        |
| 34000_r_at | X58398   | LOC90925  |
| 34446_at   | AL049701 | RABGAP1L  |
| 36270_at   | U04343   | CD86      |
| 34955_at   | AF071202 | ABCC4     |
| 35458_r_at | U18237   | ABCB10    |
| 35479_at   | AJ242015 | ADAM28    |
| 35868_at   | M91211   | AGER      |
| 35936_g_at | Y08683   | CPT1B     |
| 36227_at   | AF043129 | IL7R      |
| 36262_at   | Z12173   | GNS       |
| 36736_f_at | Y10275   | PSPH      |
| 38599_s_at | AD001530 | FAM50A    |
| 37789_at   | AF064094 | TADA2L    |
| 38129_at   | X78713   | GK        |
| 38142_at   | U38904   | ZNF211    |
| 38531_at   | AA428150 | OCEL1     |
| 38859_at   | AL080141 | SEC31B    |
| 38919_at   | AB023226 | KIAA1009  |
| 39221_at   | AF004231 | LILRB2    |
| 39223_at   | AL096749 | C1orf175  |
| 39624_at   | D89078   | LTB4R     |
| 39926_at   | U59913   | SMAD5     |
| 40375_at   | X63741   | EGR3      |
| 39940_at   | AL080094 | RPESP     |
| 40312_at   | AJ005670 | DACH1     |
| 40320_at   | AF000367 | CDC14A    |

**Supplemental Table 1: List of 1428 Core Genes**

|            |          |           |
|------------|----------|-----------|
| 40701_at   | U75362   | USP13     |
| 41056_at   | AL050198 | PART1     |
| 41077_at   | AB011115 | LOC643641 |
| 32122_at   | L31573   | SUOX      |
| 41475_at   | U91512   | NINJ1     |
| 41620_at   | AB018259 | DOCK4     |
| 31795_at   | AL022329 | ADRBK2    |
| 31837_at   | U62317   | TMEM112B  |
| 32138_at   | L07807   | DNM1      |
| 32636_f_at | AB007881 | SMG1      |
| 32668_at   | AL080076 | SSBP2     |
| 34669_at   | X96717   | TFE3      |
| 36081_s_at | AB004848 | SETD4     |
| 36523_at   | L06133   | ATP7A     |
| 35222_at   | S67970   | ZNF75     |
| 35228_at   | Y08682   | CPT1B     |
| 35246_at   | U18934   | TYRO3     |
| 35706_at   | N32859   | NR1D2     |
| 36074_at   | U12897   | IPW       |
| 36455_at   | L41162   | COL9A3    |
| 36543_at   | J02931   | F3        |
| 37248_at   | U83411   | CPZ       |
| 36879_at   | M63193   | ECGF1     |
| 36894_at   | AL031846 | CBX7      |
| 37213_at   | X90392   | DNASE1L1  |
| 37905_r_at | X66436   | GNL1      |
| 37953_s_at | U78181   | ACCN2     |
| 39735_at   | AF069987 | NIT1      |
| 40154_at   | AL096725 | TTLL3     |
| 40814_at   | L40586   | IDS       |
| 40829_at   | AB028960 | WDTC1     |
| 32158_at   | U53174   | RAD9A     |
| 41195_at   | U49957   | LPP       |
| 33350_s_at | Z78315   | WDR45     |
| 33352_at   | X57985   | HIST2H2BE |
| 33372_at   | AI189226 | RAB31     |
| 33419_at   | U83857   | API5      |
| 33446_at   | W26407   | ABAT      |
| 34303_at   | AL049949 | C10orf56  |
| 35367_at   | AB006780 | LGALS3    |
| 35763_at   | AB011112 | NBEAL2    |
| 36207_at   | D67029   | SEC14L1   |
| 36644_at   | D29963   | CD151     |
| 36575_at   | S59049   | RGS1      |
| 36584_at   | X07173   | ITIH2     |
| 36674_at   | J04130   | CCL4      |
| 36680_at   | M24895   | AMY2B     |
| 36683_at   | AI953789 | MGP       |
| 37048_at   | U58970   | TOMM34    |
| 37317_at   | L25107   | PAFAH1B1  |
| 38064_at   | X79882   | MVP       |

**Supplemental Table 1: List of 1428 Core Genes**

|             |               |            |
|-------------|---------------|------------|
| 38101_at    | AB011151      | ZCCHC14    |
| 38369_at    | U70451        | MYD88      |
| 38425_at    | U49719        | HMGCL      |
| 39540_at    | AF000561      | ZBTB7A     |
| 39829_at    | AB016811      | ARL4C      |
| 38466_at    | X82153        | CTSK       |
| 39204_at    | AF090097      | ANTXR1     |
| 39459_at    | W28765        | LOC552889  |
| 39899_at    | AC005525      | CADM4      |
| 40570_at    | AF032885      | FOXO1      |
| 40888_f_at  | W28170        | EEF1A1     |
| 39855_at    | AC005787      | FZR1       |
| 40167_s_at  | AF038187      | WSB2       |
| 40215_at    | D50840        | UGCG       |
| 40246_at    | U13897        | DLG1       |
| 40536_f_at  | AI254524      | EIF5B      |
| 41254_at    | N48190        | NA         |
| 41291_at    | AC004528      | C19orf6    |
| 41571_at    | AA872560      | REL        |
| 41825_at    | W26652        | PINK1      |
| 41500_at    | AI761818      | SKI        |
| 41550_at    | AF091071      | RER1       |
| 41596_s_at  | U43573        | NAGLU      |
| 32603_at    | W27118        | RPA2       |
| 32609_at    | AI885852      | HIST2H2AA4 |
| 33137_at    | Y13622        | LTBP4      |
| 33164_at    | AJ132545      | TESK2      |
| 2053_at     | M34064        | CDH2       |
| 1894_f_at   | HG3236-HT3413 | NA         |
| 2069_s_at   | L23805        | CTNNA1     |
| 1948_f_at   | U31511        | NOS2A      |
| 1919_at     | X16316        | VAV1       |
| 1557_at     | U24152        | PAK1       |
| 1738_at     | M81933        | CDC25A     |
| 1638_at     | U11732        | ETV6       |
| 1589_s_at   | L42243        | IFNAR2     |
| 1533_at     | U63139        | RAD50      |
| 1457_at     | M64174        | JAK1       |
| 1397_at     | L32976        | MAP3K11    |
| 1269_at     | M61906        | PIK3R1     |
| 1056_s_at   | M90391        | IL16       |
| 877_at      | M27691        | CREB1      |
| 879_at      | M30818        | MX2        |
| 815_at      | U70987        | DOK1       |
| 698_f_at    | HG3635-HT3845 | NA         |
| 664_at      | L19593        | IL8RB      |
| 617_at      | M24902        | ACPP       |
| 509_at      | U44378        | SMAD4      |
| 459_s_at    | U68485        | BIN1       |
| 180_at      | S82470        | LENG4      |
| 160028_s_at | X12949        | RET        |

**Supplemental Table 1: List of 1428 Core Genes**

|           |        |      |
|-----------|--------|------|
| 160025_at | X70340 | TGFA |
|-----------|--------|------|
