# Supplementary material for: Decomposition of Gene Expression State Space Trajectories
Source: PubMed Central journal article supplement (PMC2791157; doi:10.1371/journal.pcbi.1000626), 2009-12-24
Supplement: pcbi.1000626.s009.pdf [file pcbi.1000626.s009.pdf]

**Supplemental Table 2: List of 1462 Transient Genes**

| Affymetrix ID | GenBank Accession Number | Gene Symbol |
|---------------|--------------------------|-------------|
| 31506_s_at    | L12691                   | DEFA3       |
| 37066_at      | X55668                   | PRTN3       |
| 38457_at      | L21715                   | TNNI2       |
| 33098_at      | U28694                   | CCR3        |
| 34091_s_at    | M14144                   | VIM         |
| 37194_at      | M68891                   | GATA2       |
| 39997_at      | AF005664                 | CFP         |
| 37096_at      | M34379                   | ELA2        |
| 34362_at      | M55531                   | SLC2A5      |
| 38717_at      | AL050159                 | METTL7A     |
| 37724_at      | V00568                   | MYC         |
| 1427_g_at     | D89077                   | SLA         |
| 1973_s_at     | V00568                   | MYC         |
| 36897_at      | AL022327                 | MLC1        |
| 38972_at      | AF052169                 | KCTD12      |
| 41814_at      | M29877                   | FUCA1       |
| 36661_s_at    | X06882                   | CD14        |
| 37701_at      | L13463                   | RGS2        |
| 41038_at      | M32011                   | NCF2        |
| 33362_at      | AF094521                 | CDC42EP3    |
| 33412_at      | Z83844                   | LGALS1      |
| 41471_at      | W72424                   | S100A9      |
| 38631_at      | M92357                   | TNFAIP2     |
| 40159_r_at    | M55067                   | NCF1        |
| 35315_at      | X02544                   | ORM1        |
| 1426_at       | D89077                   | SLA         |
| 34177_at      | AF038660                 | B4GALT2     |
| 1110_at       | M21624                   | TRD@        |
| 37357_at      | D00723                   | GCSH        |
| 37328_at      | X07743                   | PLEK        |
| 31409_at      | U35459                   | SERPINB10   |
| 34445_at      | AB007940                 | RABGAP1L    |
| 39994_at      | D10925                   | CCR1        |
| 1780_at       | M19722                   | FGR         |
| 239_at        | M63138                   | CTSD        |
| 39028_at      | U72761                   | RANBP5      |
| 34840_at      | AI700633                 | SERINC5     |
| 33371_s_at    | U59877                   | RAB31       |
| 41300_s_at    | AA477898                 | ITM2B       |
| 39827_at      | AA522530                 | DDIT4       |
| 37105_at      | M16117                   | CTSG        |
| 32643_at      | L07956                   | GBE1        |
| 39681_at      | AF060568                 | ZBTB16      |
| 40310_at      | AF051152                 | TLR2        |
| 36493_at      | M33552                   | LSP1        |
| 36889_at      | M33195                   | FCER1G      |
| 32193_at      | AF030339                 | PLXNC1      |
| 32819_at      | AJ223352                 | HIST1H2BK   |
| 2045_s_at     | M16592                   | HCK         |
| 875_g_at      | M26683                   | CCL2        |

**Supplemental Table 2: List of 1462 Transient Genes**

|            |          |           |
|------------|----------|-----------|
| 38514_at   | M27749   | IGLL1     |
| 33942_s_at | AF004563 | STXBP1    |
| 38614_s_at | U77413   | OGT       |
| 1794_at    | M92287   | CCND3     |
| 41308_at   | U37408   | CTBP1     |
| 1985_s_at  | X73066   | NME1      |
| 33781_s_at | AF075599 | UBE2M     |
| 35615_at   | D50914   | BOP1      |
| 39056_at   | X53793   | PAICS     |
| 40091_at   | U00115   | BCL6      |
| 33387_at   | AB007854 | GAS7      |
| 36617_at   | X77956   | ID1       |
| 36984_f_at | X89214   | HPR       |
| 32562_at   | X72012   | ENG       |
| 32529_at   | X69910   | CKAP4     |
| 1852_at    | X02910   | TNF       |
| 893_at     | M91670   | UBE2S     |
| 1052_s_at  | M83667   | CEBPD     |
| 36292_at   | U07225   | P2RY2     |
| 2042_s_at  | M15024   | MYB       |
| 31858_at   | X07315   | NUTF2     |
| 39073_at   | AL038662 | NME1      |
| 39582_at   | AL050166 | CYLD      |
| 38326_at   | M69199   | G0S2      |
| 38363_at   | W60864   | TYROBP    |
| 39345_at   | AI525834 | NPC2      |
| 35820_at   | M76477   | GM2A      |
| 37011_at   | U49392   | AIF1      |
| 32574_at   | X59960   | SMPD1     |
| 32587_at   | U07802   | ZFP36L2   |
| 679_at     | J04990   | CTSG      |
| 37179_at   | S77763   | NFE2      |
| 36105_at   | M18728   | CEACAM6   |
| 41188_at   | W28186   | LAPTM4B   |
| 32791_at   | L19183   | TMEM97    |
| 35372_r_at | M28130   | IL8       |
| 1500_at    | X51630   | WT1       |
| 36217_at   | Z35102   | STK38     |
| 32675_at   | D21878   | BST1      |
| 38006_at   | M37766   | CD48      |
| 34308_at   | U90551   | HIST1H2AC |
| 36103_at   | D90144   | CCL3      |
| 1814_at    | D50683   | TGFBR2    |
| 1117_at    | L27943   | CDA       |
| 33963_at   | M96326   | AZU1      |
| 32749_s_at | AL050396 | FLNA      |
| 38233_at   | AF093265 | HOMER3    |
| 33791_at   | Y15227   | DLEU1     |
| 37949_at   | J03798   | SNRPD1    |
| 41468_at   | M30894   | TARP      |
| 38160_at   | AF011333 | LY75      |

**Supplemental Table 2: List of 1462 Transient Genes**

|            |              |         |
|------------|--------------|---------|
| 41096_at   | AI126134     | S100A8  |
| 31870_at   | X14046       | CD37    |
| 35193_at   | AF060219     | RCBTB2  |
| 36488_at   | AB011542     | MEGF9   |
| 36922_at   | X59618       | RRM2    |
| 37995_s_at | M67468       | FMR1    |
| 39143_at   | U08015       | NFATC1  |
| 1592_at    | J04088       | TOP2A   |
| 1173_g_at  | HG172-HT3924 | NA      |
| 461_at     | U70063       | ASAH1   |
| 34375_at   | M28225       | CCL2    |
| 446_at     | U89896       | CSNK1G2 |
| 38250_at   | D26488       | WDR43   |
| 1530_g_at  | U50534       | FRY     |
| 41213_at   | X67951       | PRDX1   |
| 41600_at   | U87954       | PA2G4   |
| 1521_at    | X17620       | NME1    |
| 33253_at   | D50919       | TRIM14  |
| 37726_at   | X06323       | MRPL3   |
| 39135_at   | AB018310     | DIP     |
| 38418_at   | X59798       | CCND1   |
| 38763_at   | L29254       | SORD    |
| 36287_at   | X83368       | PIK3CG  |
| 36313_at   | M55267       | EVI2A   |
| 37099_at   | AI806222     | ALOX5AP |
| 41409_at   | AF044896     | C1orf38 |
| 32731_at   | AB018247     | APBB3   |
| 34745_at   | AF070570     | RAPGEF2 |
| 36495_at   | U21931       | FBP1    |
| 40081_at   | L26232       | PLTP    |
| 41198_at   | AF055008     | GRN     |
| 38087_s_at | W72186       | S100A4  |
| 41796_at   | AB029015     | PLCL2   |
| 1913_at    | U47414       | CCNG2   |
| 1558_g_at  | U24152       | PAK1    |
| 1815_g_at  | D50683       | TGFBR2  |
| 35807_at   | M21186       | CYBA    |
| 41719_i_at | AF009767     | FADS1   |
| 37842_at   | AF054589     | MDFIC   |
| 35771_at   | AF049460     | DEAF1   |
| 34965_at   | AF031824     | CST7    |
| 31863_at   | D80001       | RRP1B   |
| 36613_at   | U09585       | IFRD2   |
| 1474_s_at  | U22376       | MYB     |
| 1196_at    | D00591       | RCC1    |
| 37927_at   | X12654       | RCC1    |
| 36597_at   | D21262       | NOLC1   |
| 39812_at   | X79865       | MRPL12  |
| 38998_g_at | X96924       | SLC25A1 |
| 36159_s_at | U29185       | PRNP    |
| 38429_at   | U29344       | FASN    |

**Supplemental Table 2: List of 1462 Transient Genes**

|            |               |            |
|------------|---------------|------------|
| 32916_at   | X54134        | PTPRE      |
| 37472_at   | U60337        | MANBA      |
| 33223_at   | AB011133      | MAST3      |
| 33324_s_at | D88357        | CDC2       |
| 37994_at   | X69962        | FMR1       |
| 38666_at   | M85169        | PSCD1      |
| 40862_i_at | X15334        | CKB        |
| 33448_at   | AB000095      | SPINT1     |
| 34836_at   | U18420        | RAB5C      |
| 35369_at   | AB023154      | DTX4       |
| 36180_s_at | X75346        | MAPKAPK2   |
| 36634_at   | U72649        | BTG2       |
| 36938_at   | U70063        | ASAH1      |
| 37398_at   | AA100961      | PECAM1     |
| 37723_at   | U47414        | CCNG2      |
| 38072_at   | AL031432      | C1orf63    |
| 38391_at   | M94345        | CAPG       |
| 40607_at   | U97105        | DPYSL2     |
| 1916_s_at  | V01512        | FOS        |
| 1830_s_at  | M38449        | TGFB1      |
| 1797_at    | U40343        | CDKN2D     |
| 1294_at    | L13852        | UBE1L      |
| 925_at     | J03909        | IFI30      |
| 810_at     | U64105        | ARHGEF1    |
| 756_at     | D26350        | ITPR2      |
| 33530_at   | M33326        | CEACAM8    |
| 36933_at   | D87953        | NDRG1      |
| 35695_at   | U67615        | LYST       |
| 31855_at   | U61374        | SRPX       |
| 32843_s_at | M30448        | FBL        |
| 36957_at   | W22296        | ZMYND8     |
| 41827_f_at | AI932613      | LOC91316   |
| 38618_at   | AC002073      | PPP1R14BP1 |
| 41754_at   | M92439        | LRPPRC     |
| 32825_at   | Y10805        | PRMT1      |
| 1468_at    | U12595        | TRAP1      |
| 34291_at   | U07424        | FARSA      |
| 41225_at   | AL049417      | DUSP3      |
| 1936_s_at  | HG3523-HT4899 | NA         |
| 674_g_at   | J04031        | MTHFD1     |
| 32317_s_at | U34804        | SULT1A3    |
| 32868_at   | L10386        | TGM3       |
| 34435_at   | AB008775      | AQP9       |
| 36229_at   | U58917        | IL17RA     |
| 36780_at   | M25915        | CLU        |
| 38138_at   | AC004668      | S100A11    |
| 40720_at   | AL022398      | TRAF3IP3   |
| 41048_at   | D90070        | PMAIP1     |
| 36053_at   | AF041248      | CDKN2C     |
| 36509_at   | AL049998      | PIK3C2A    |
| 37967_at   | AF000424      | LST1       |

**Supplemental Table 2: List of 1462 Transient Genes**

|            |             |           |
|------------|-------------|-----------|
| 38354_at   | X52560      | CEBPB     |
| 39032_at   | AJ222700    | TSC22D1   |
| 39728_at   | J03909      | IFI30     |
| 39061_at   | D28137      | BST2      |
| 39348_at   | X99209      | PRMT2     |
| 32253_at   | AB007927    | RERE      |
| 34387_at   | D86960      | LPGAT1    |
| 35739_at   | AB002369    | MTMR3     |
| 35785_at   | W28281      | GABARAPL1 |
| 38393_at   | D87434      | KIAA0247  |
| 39134_at   | AJ006973    | TOM1      |
| 41549_s_at | AF091077    | AP1S2     |
| 2009_at    | U33284      | PTK2B     |
| 1925_at    | Z36714      | CCNF      |
| 1803_at    | X05360      | CDC2      |
| 1795_g_at  | M92287      | CCND3     |
| 1150_at    | HG620-HT620 | NA        |
| 478_g_at   | U51127      | IRF5      |
| 289_at     | L29277      | STAT3     |
| 36979_at   | M20681      | SLC2A3    |
| 40619_at   | M91670      | UBE2S     |
| 33131_at   | X70683      | SOX4      |
| 33977_at   | U67369      | GFI1      |
| 39661_s_at | AF034102    | SLC29A2   |
| 40329_at   | AL031228    | SLC39A7   |
| 33243_at   | AF099935    | TNFAIP8   |
| 1470_at    | U21090      | POLD2     |
| 831_at     | U28042      | DDX10     |
| 430_at     | X00737      | NP        |
| 32165_at   | L41887      | SFRS7     |
| 37036_at   | AB002299    | MDN1      |
| 38729_at   | M88279      | FKBP4     |
| 39825_at   | U25147      | SLC25A1   |
| 37615_at   | D86962      | GRB10     |
| 36650_at   | D13639      | CCND2     |
| 36161_at   | M34175      | AP2B1     |
| 41342_at   | D38076      | RANBP1    |
| 1373_at    | M31523      | TCF3      |
| 32434_at   | D10522      | MARCKS    |
| 39397_at   | M64497      | NR2F2     |
| 41259_at   | AI553745    | HSPC111   |
| 32275_at   | X04470      | SLPI      |
| 32367_at   | AL049634    | SIRPB1    |
| 34914_at   | U94778      | PSTPIP1   |
| 38149_at   | D29642      | ARHGAP25  |
| 40019_at   | M60830      | EVI2B     |
| 31804_f_at | X78283      | SULT1A1   |
| 37200_at   | J04162      | FCGR3B    |
| 38686_at   | X71490      | ATP6V0D1  |
| 39075_at   | AF040958    | NEU1      |
| 39689_at   | AI362017    | CST3      |

**Supplemental Table 2: List of 1462 Transient Genes**

|            |          |           |
|------------|----------|-----------|
| 40432_at   | AA522891 | GNS       |
| 40448_at   | M92843   | ZFP36     |
| 41215_s_at | D13891   | ID2       |
| 32769_at   | AB023210 | WDFY3     |
| 33385_g_at | U31346   | CAST      |
| 33839_at   | D26350   | ITPR2     |
| 34311_at   | X76648   | GLRX      |
| 36179_at   | U12779   | MAPKAPK2  |
| 38798_s_at | AI741833 | APIG2     |
| 38837_at   | W26226   | TXNDC13   |
| 39923_at   | AI935420 | ARHGAP12  |
| 40925_at   | AA554945 | C7orf44   |
| 40960_at   | M22921   | B4GALT1   |
| 41491_s_at | AB028944 | ATP11A    |
| 32606_at   | AA135683 | BASP1     |
| 1038_s_at  | U19247   | IFNGR1    |
| 210_at     | M95678   | PLCB2     |
| 175_s_at   | U33053   | PKN1      |
| 160029_at  | X07109   | PRKCB1    |
| 40095_at   | J03037   | CA2       |
| 35926_s_at | AF009005 | LILRB1    |
| 32070_at   | X97267   | PTPRCAP   |
| 32173_at   | X95384   | HRSP12    |
| 36766_at   | X55988   | RNASE2    |
| 33799_at   | U76248   | SIAH2     |
| 35758_at   | AB024301 | RUVBL2    |
| 1750_at    | AD000092 | FARSA     |
| 41408_at   | AF042169 | SUPV3L1   |
| 40124_at   | Y18418   | RUVBL1    |
| 41490_at   | Y00971   | PRPS2     |
| 749_at     | D78586   | CAD       |
| 37686_s_at | Y09008   | UNG       |
| 1942_s_at  | U37022   | CDK4      |
| 1306_at    | D12686   | EIF4G1    |
| 31528_f_at | Z83738   | HIST1H2BM |
| 31508_at   | S73591   | TXNIP     |
| 31510_s_at | Z48950   | H3F3B     |
| 36347_f_at | Z98744   | HIST1H2BN |
| 36417_s_at | AF035295 | ACAA1     |
| 32901_s_at | AC005192 | IFRD1     |
| 36218_g_at | Z35102   | STK38     |
| 40697_at   | X51688   | CCNA2     |
| 41396_at   | AB006629 | CLIP2     |
| 31802_at   | D86979   | KIAA0226  |
| 33227_at   | AI984234 | IL10RB    |
| 34752_at   | AL080111 | NEK7      |
| 36564_at   | W27419   | RNF19B    |
| 36856_at   | W28743   | ANKDD1A   |
| 37173_at   | Z15005   | CENPE     |
| 37272_at   | X57206   | ITPKB     |
| 39417_at   | AB028951 | CDC2L6    |

**Supplemental Table 2: List of 1462 Transient Genes**

|            |          |           |
|------------|----------|-----------|
| 35299_at   | AB000409 | MKNK1     |
| 35317_at   | AB014579 | MGEA5     |
| 40585_at   | D25538   | ADCY7     |
| 40244_s_at | AI743654 | MPPE1     |
| 41249_at   | AL031282 | NADK      |
| 41594_at   | M64174   | JAK1      |
| 1943_at    | X51688   | CCNA2     |
| 1824_s_at  | J05614   | PCNA      |
| 1398_g_at  | L32976   | MAP3K11   |
| 1347_at    | S78187   | CDC25B    |
| 527_at     | U14518   | CENPA     |
| 318_at     | D64142   | H1FX      |
| 106_at     | Z35278   | RUNX3     |
| 41654_at   | X02994   | ADA       |
| 33284_at   | M19507   | MPO       |
| 38510_at   | AL049435 | NA        |
| 605_at     | L78833   | VAT1      |
| 34283_at   | AL050125 | XYLT1     |
| 36453_at   | AB018254 | KBTBD11   |
| 36322_at   | AB012668 | FUT7      |
| 40522_at   | X59834   | GLUL      |
| 34319_at   | AA131149 | S100P     |
| 35879_at   | M77140   | GAL       |
| 41058_g_at | AI760162 | THEM2     |
| 38030_at   | AB002330 | SR140     |
| 38164_at   | U57629   | RPGR      |
| 40365_at   | M63904   | GNA15     |
| 35620_at   | AF043250 | TOMM40    |
| 36088_at   | AJ006291 | DSCR2     |
| 39357_at   | U72514   | EMG1      |
| 37700_at   | X92106   | BLMH      |
| 38811_at   | D82348   | ATIC      |
| 34998_at   | AF059531 | PRMT3     |
| 41670_at   | R38263   | D15Wsu75e |
| 37991_at   | L38961   | STT3A     |
| 37632_s_at | X98260   | ZRF1      |
| 38678_at   | AA733050 | SNRPE     |
| 40198_at   | L06132   | VDAC1     |
| 40982_at   | AA926957 | TSR1      |
| 33113_at   | U65093   | CITED2    |
| 1751_g_at  | AD000092 | FARSA     |
| 1126_s_at  | L05424   | CD44      |
| 32004_s_at | W32483   | CDC2L2    |
| 40696_at   | U50062   | RIPK1     |
| 41084_at   | AI659108 | ZNF428    |
| 32142_at   | U26424   | STK3      |
| 35251_at   | X51435   | HIVEP1    |
| 36465_at   | U51127   | IRF5      |
| 36843_at   | AB005666 | SIPA1     |
| 38297_at   | X98654   | PITPNM1   |
| 39057_at   | L04733   | KLC1      |

**Supplemental Table 2: List of 1462 Transient Genes**

|            |          |           |
|------------|----------|-----------|
| 39388_at   | AA902713 | CAMK2G    |
| 40082_at   | D10040   | ACSL1     |
| 41747_s_at | U49020   | MEF2A     |
| 33390_at   | AA203487 | CD68      |
| 33453_at   | AI400326 | PTPN18    |
| 33841_at   | R48209   | KIAA1539  |
| 34304_s_at | AL050290 | SAT1      |
| 34409_at   | AL080164 | LRP10     |
| 34892_at   | AF016266 | TNFRSF10B |
| 36136_at   | AF010315 | TP53I11   |
| 36152_at   | X79354   | GDI1      |
| 36578_at   | U37547   | BIRC2     |
| 37377_i_at | M13452   | LMNA      |
| 38381_at   | U32315   | STX3      |
| 38810_at   | AF039241 | HDAC5     |
| 39530_at   | L35240   | PDLIM7    |
| 40203_at   | AJ012375 | EIF1      |
| 41258_at   | N29665   | NSUN5C    |
| 41809_at   | AI656421 | C7orf23   |
| 33121_g_at | AF045229 | RGS10     |
| 1461_at    | M69043   | NFKBIA    |
| 946_at     | D50663   | DYNLT1    |
| 857_at     | S87759   | PPM1A     |
| 497_at     | U32680   | CLN3      |
| 464_s_at   | U72882   | IFI35     |
| 33813_at   | AI813532 | TNFRSF1B  |
| 894_g_at   | M91670   | UBE2S     |
| 1583_at    | M32315   | TNFRSF1B  |
| 41734_at   | AB020677 | DENND3    |
| 38359_at   | Y12336   | RASGRP2   |
| 37695_at   | D79983   | RNF144A   |
| 33753_at   | AB014566 | DAAM1     |
| 41126_at   | AA978353 | SLC1A4    |
| 32543_at   | M84739   | CALR      |
| 922_at     | J02902   | PPP2R1A   |
| 35681_r_at | AB011141 | ZEB2      |
| 32611_at   | X75252   | PEBP1     |
| 35963_at   | AI201243 | PFDN6     |
| 41106_at   | AF022797 | KCNN4     |
| 1911_s_at  | M60974   | GADD45A   |
| 1100_at    | L76191   | IRAK1     |
| 41869_at   | U78310   | PES1      |
| 33815_at   | J03626   | UMPS      |
| 34765_at   | D13645   | KIAA0020  |
| 33837_at   | AF069765 | SRP72     |
| 39173_at   | X56597   | FBL       |
| 2012_s_at  | U34994   | PRKDC     |
| 39677_at   | D80008   | GINS1     |
| 40347_at   | AA913812 | ANP32E    |
| 33708_at   | AF045584 | SLC43A1   |
| 35731_at   | X16983   | ITGA4     |



**Supplemental Table 2: List of 1462 Transient Genes**

|            |          |          |
|------------|----------|----------|
| 37945_at   | U91316   | ACOT7    |
| 33348_at   | M80627   | TCF12    |
| 38753_at   | AF039022 | XPOT     |
| 39175_at   | D25328   | PFKP     |
| 40537_at   | AB018284 | EIF5B    |
| 35008_at   | AB002345 | PER2     |
| 31838_at   | U79274   | C12orf24 |
| 33250_at   | AL031228 | WDR46    |
| 39355_at   | X76388   | ABCE1    |
| 41209_at   | M15856   | LPL      |
| 37698_at   | X97335   | AKAP1    |
| 38384_at   | X54199   | GART     |
| 266_s_at   | L33930   | CD24     |
| 31672_g_at | D82351   | RBMS1    |
| 35132_at   | X98411   | MYO1F    |
| 35012_at   | M81750   | MNDA     |
| 35466_at   | W73046   | DNAJB12  |
| 37100_at   | AJ008112 | FMNL1    |
| 39319_at   | U20158   | LCP2     |
| 33228_g_at | AI984234 | IL10RB   |
| 33263_at   | X67098   | ENOSF1   |
| 34749_at   | U83461   | SLC31A2  |
| 35974_at   | U10485   | LRMP     |
| 37177_at   | Y00636   | CD58     |
| 38287_at   | AA808961 | PSMB9    |
| 39340_at   | M16424   | HEXA     |
| 39708_at   | L29277   | STAT3    |
| 40120_at   | X90999   | HAGH     |
| 40415_at   | X14813   | ACAA1    |
| 40518_at   | Y00062   | PTPRC    |
| 40841_at   | AF049910 | TACC1    |
| 32775_r_at | AB006746 | PLSCR1   |
| 32166_at   | AB028950 | TLN1     |
| 32182_at   | AB023182 | STK38L   |
| 32824_at   | AF039704 | TPP1     |
| 33367_s_at | D88674   | AZIN1    |
| 33895_at   | AL050373 | SH3YL1   |
| 35302_at   | AJ132712 | NXF1     |
| 35783_at   | H93123   | VAMP3    |
| 36142_at   | X79204   | ATXN1    |
| 36607_at   | Z99716   | NAGA     |
| 37003_at   | X62654   | CD63     |
| 37025_at   | AL120815 | LITAF    |
| 37366_at   | AL049969 | PDLIM5   |
| 37679_at   | Y10313   | IFRD1    |
| 38110_at   | AF000652 | SDCBP    |
| 38445_at   | Y09160   | ARHGEF1  |
| 39176_f_at | M54994   | CEL      |
| 40282_s_at | M84526   | CFD      |
| 40568_at   | L35249   | ATP6V1B2 |
| 1976_s_at  | X06292   | FES      |

**Supplemental Table 2: List of 1462 Transient Genes**

|             |               |         |
|-------------|---------------|---------|
| 1915_s_at   | V01512        | FOS     |
| 1844_s_at   | L05624        | MAP2K1  |
| 1134_at     | L13738        | TNK2    |
| 883_s_at    | M54915        | PIM1    |
| 333_s_at    | HG2639-HT2735 | NA      |
| 450_g_at    | U66469        | CGRRF1  |
| 419_at      | X65550        | MKI67   |
| 319_g_at    | D64142        | H1FX    |
| 160027_s_at | Y00285        | IGF2R   |
| 37027_at    | M80899        | AHNAK   |
| 33097_at    | U80982        | CEBPE   |
| 36372_at    | U51333        | HK3     |
| 34785_at    | AB028948      | MED13L  |
| 32550_r_at  | Y11525        | CEBPA   |
| 36175_s_at  | AL023584      | HIVEP2  |
| 37310_at    | X02419        | PLAU    |
| 1529_at     | U50534        | FRY     |
| 37215_at    | AF046798      | PYGL    |
| 37920_at    | U70370        | PITX1   |
| 40147_at    | U18009        | VAT1    |
| 32800_at    | U66306        | RXRA    |
| 39971_at    | M22637        | LYL1    |
| 41199_s_at  | W27050        | SFPQ    |
| 1405_i_at   | M21121        | CCL5    |
| 1369_s_at   | M28130        | IL8     |
| 35983_at    | AC004528      | WDR18   |
| 38311_at    | AF055012      | TGIF2   |
| 40506_s_at  | U75686        | PABPC4  |
| 34380_at    | AC004472      | STOML2  |
| 895_at      | L19686        | MIF     |
| 39932_at    | AI655015      | NA      |
| 37050_r_at  | AI130910      | TOMM34  |
| 33135_at    | U17566        | SLC19A1 |
| 39638_at    | S73885        | TFAP4   |
| 39980_at    | AB000449      | VRK1    |
| 40756_at    | AF081280      | NPM3    |
| 31899_at    | D14659        | TTC35   |
| 35643_at    | X76732        | NUCB2   |
| 37281_at    | D87071        | FAM38A  |
| 39767_at    | D13627        | CCT8    |
| 40827_at    | U04953        | IARS    |
| 32205_at    | AF072860      | PRKRA   |
| 1388_g_at   | J03258        | VDR     |
| 40354_at    | AB023421      | HSPA4L  |
| 31821_at    | AB011167      | PPRC1   |
| 36460_at    | AF008442      | POLR1C  |
| 38687_at    | AL050051      | ANAPC13 |
| 38996_at    | U15655        | ERF     |
| 34882_at    | Y12065        | NOL5A   |
| 38036_at    | L35035        | RPIA    |
| 931_at      | L08177        | EBI2    |

**Supplemental Table 2: List of 1462 Transient Genes**

|            |             |            |
|------------|-------------|------------|
| 31697_s_at | J04755      | FTHP1      |
| 34642_at   | U28964      | YWHAZ      |
| 32964_at   | X81479      | EMR1       |
| 36312_at   | L40377      | SERPINB8   |
| 37470_at   | AF013249    | LAIR1      |
| 37509_at   | AF046059    | CRLF3      |
| 31860_at   | X51804      | TMEM11     |
| 32091_at   | AB007915    | SLC25A44   |
| 32696_at   | X59841      | PBX3       |
| 33305_at   | M93056      | SERPINB1   |
| 33308_at   | M15182      | GUSB       |
| 33333_at   | AB007863    | PIP3-E     |
| 34192_at   | AB011104    | VPS13B     |
| 34735_at   | U43195      | ROCK1      |
| 35172_at   | AF049891    | TPST2      |
| 36062_at   | AF062075    | LPXN       |
| 37278_at   | X92762      | TAZ        |
| 38264_at   | U74324      | RABIF      |
| 38641_at   | AJ133115    | TSC22D4    |
| 39369_at   | AB023152    | MAN2B2     |
| 41202_s_at | AF000152    | CTDSP2     |
| 41758_at   | AL096879    | TMEM184B   |
| 41784_at   | AL080186    | SFRS18     |
| 32195_at   | AL049450    | MSL-1      |
| 33916_at   | AB023192    | NISCH      |
| 32826_at   | AJ133133    | ENTPD1     |
| 33854_at   | AA877795    | ATP6V1D    |
| 34835_at   | D87442      | NCSTN      |
| 34827_at   | AF045458    | ULK1       |
| 34877_at   | AL039831    | JAK1       |
| 35329_at   | AF091084    | CYB5R1     |
| 35770_at   | D16469      | ATP6AP1    |
| 36151_at   | U60644      | PLD3       |
| 36170_at   | D83198      | ETHE1      |
| 36963_at   | W28263      | PGD        |
| 37021_at   | X16832      | CTSH       |
| 37298_at   | AF044671    | GABARAP    |
| 37346_at   | M57567      | ARF5       |
| 37406_at   | X94232      | MAPRE2     |
| 39099_at   | X97064      | SEC23A     |
| 39120_at   | AA224832    | MT1X       |
| 40193_at   | X51956      | ENO2       |
| 1906_at    | HG511-HT511 | NA         |
| 1696_at    | D29013      | POLB       |
| 1568_s_at  | L42243      | IFNAR2     |
| 1536_at    | U77949      | CDC6       |
| 1305_s_at  | D12620      | CYP4F3     |
| 903_at     | L42373      | PPP2R5A    |
| 286_at     | L19779      | HIST2H2AA3 |
| 201_s_at   | S82297      | B2M        |
| 37054_at   | J04739      | BPI        |

**Supplemental Table 2: List of 1462 Transient Genes**

|            |               |          |
|------------|---------------|----------|
| 33454_at   | AF016903      | AGRN     |
| 40164_at   | X69550        | ARHGDI4  |
| 37185_at   | Y00630        | SERPINB2 |
| 37186_s_at | U11863        | ABP1     |
| 649_s_at   | L06797        | CXCR4    |
| 1515_at    | HG4074-HT4344 | NA       |
| 39253_s_at | M29893        | RALA     |
| 835_at     | U41745        | PDAP1    |
| 35414_s_at | U77914        | JAG1     |
| 39089_at   | Y07604        | NME4     |
| 1403_s_at  | M21121        | CCL5     |
| 35972_at   | AA181196      | RNASEH2B |
| 36264_at   | S75168        | MATK     |
| 37445_at   | AB015633      | TMEM5    |
| 38728_at   | D86978        | NUP205   |
| 38794_at   | X53390        | UBTF     |
| 32102_at   | AB018273      | SACS     |
| 41749_at   | U53003        | C21orf33 |
| 36987_at   | M94362        | LMNB2    |
| 38473_at   | M63180        | TARS     |
| 38782_at   | M95809        | GTF2H1   |
| 41807_at   | AL040137      | NA       |
| 36926_at   | X80692        | MAPK6    |
| 38727_at   | M23161        | MCFD2    |
| 34171_at   | A1867349      | NCLN     |
| 37501_at   | Y07707        | NKRF     |
| 35180_at   | AL050205      | LARP4    |
| 36928_at   | AJ011806      | ZNF146   |
| 39418_at   | AJ007398      | RSL1D1   |
| 41250_at   | U24169        | JTV1     |
| 33943_at   | L20941        | FTH1     |
| 33944_at   | S60099        | APLP2    |
| 34433_at   | AF035299      | DOK1     |
| 38575_at   | AF070528      | MALT1    |
| 37147_at   | AF020044      | CLEC11A  |
| 38188_s_at | L28821        | MAN2A2   |
| 38964_r_at | U12707        | WAS      |
| 39230_at   | AL022318      | APOBEC3B |
| 40041_at   | AF017790      | NDC80    |
| 40726_at   | U37426        | KIF11    |
| 41386_i_at | AB002344      | JMJD3    |
| 41618_at   | M91669        | COL17A1  |
| 41634_at   | D87445        | KIAA0256 |
| 32104_i_at | U66063        | CAMK2G   |
| 32135_at   | U00968        | SREBF1   |
| 32681_at   | S68616        | SLC9A1   |
| 33759_at   | X04327        | BPGM     |
| 35646_at   | Z35093        | SURF1    |
| 35655_at   | AB002377      | ANKRD28  |
| 36921_at   | U02556        | DYNLT3   |
| 37268_at   | U43368        | VEGFB    |

**Supplemental Table 2: List of 1462 Transient Genes**

|            |          |           |
|------------|----------|-----------|
| 38310_at   | AB014591 | CNOT3     |
| 38704_at   | AB007934 | MACF1     |
| 37961_at   | U90907   | PIK3R3    |
| 38266_at   | W25798   | RBBP6     |
| 38610_s_at | X14487   | KRT10     |
| 39003_at   | Z50022   | PTTG1IP   |
| 40779_at   | U59919   | KIFAP3    |
| 39402_at   | M15330   | IL1B      |
| 40153_at   | X57522   | TAP1      |
| 40446_at   | AL021366 | PHF1      |
| 40505_at   | AA883502 | UBE2L6    |
| 41168_at   | AF029750 | TAPBP     |
| 32207_at   | M64925   | MPP1      |
| 33833_at   | J05243   | SPTAN1    |
| 33438_at   | AL049981 | WBP2      |
| 33867_s_at | X77494   | RBMS1     |
| 34830_at   | W25986   | ECOP      |
| 35267_g_at | AL049288 | BLCAP     |
| 34876_at   | U65090   | CPD       |
| 35336_at   | AL021707 | UNC84B    |
| 35767_at   | AI565760 | GABARAPL2 |
| 37294_at   | X61123   | BTG1      |
| 37384_at   | D86995   | PPM1F     |
| 37688_f_at | M31932   | FCGR2A    |
| 38104_at   | U78302   | DECR1     |
| 38121_at   | X59892   | WARS      |
| 39150_at   | U69559   | RNF11     |
| 40235_at   | L13738   | TNK2      |
| 41288_at   | AL036744 | CALM1     |
| 1986_at    | X74594   | RBL2      |
| 1825_at    | L33075   | IQGAP1    |
| 1505_at    | D00596   | TYMS      |
| 1434_at    | U92436   | PTEN      |
| 1166_at    | D78151   | PSMD2     |
| 1243_at    | U18300   | DDB2      |
| 907_at     | M13792   | ADA       |
| 802_at     | X84002   | TAF12     |
| 653_at     | L07540   | RFC5      |
| 641_at     | L76517   | PSEN1     |
| 574_s_at   | M87507   | CASP1     |
| 404_at     | X52425   | IL4R      |
| 402_s_at   | X69819   | ICAM3     |
| 101_at     | Y09305   | DYRK4     |
| 167_at     | U49436   | EIF5      |
| 39649_at   | X78817   | ARHGAP4   |
| 40332_at   | AF109134 | OGFR      |
| 40567_at   | AF081484 | TUBA1B    |
| 812_at     | U68111   | PPP1R2    |
| 198_g_at   | U29656   | NME3      |
| 37674_at   | Y00451   | ALAS1     |
| 1519_at    | J04102   | ETS2      |

**Supplemental Table 2: List of 1462 Transient Genes**

|            |          |           |
|------------|----------|-----------|
| 32554_s_at | Y12781   | TBL1X     |
| 40690_at   | X54942   | CKS2      |
| 1506_at    | D11086   | IL2RG     |
| 37827_r_at | AJ237839 | DOPEY2    |
| 34314_at   | X59543   | RRM1      |
| 37670_at   | J04543   | ANXA7     |
| 38085_at   | AI740522 | CBX3      |
| 828_at     | U19487   | PTGER2    |
| 31873_at   | U52112   | ARD1A     |
| 36847_r_at | AA121509 | LSM7      |
| 38352_at   | AF016371 | PPIH      |
| 38679_g_at | AA733050 | SNRPE     |
| 40414_at   | X59303   | VAR5      |
| 35318_at   | AB007944 | FAM20B    |
| 37659_at   | L42572   | IMMT      |
| 38760_f_at | U90546   | BTN3A2    |
| 2025_s_at  | M80261   | APEX1     |
| 41200_at   | Z22555   | SCARB1    |
| 32221_at   | AL050361 | MRPS18B   |
| 1564_at    | M63167   | AKT1      |
| 36876_at   | M55150   | FAH       |
| 36930_at   | L05425   | GNL2      |
| 39713_at   | AJ132440 | JARID1B   |
| 40103_at   | X51521   | VIL2      |
| 35754_at   | L40391   | TMED10    |
| 37730_at   | U22055   | SND1      |
| 38375_at   | AF112219 | ESD       |
| 40979_at   | AJ243310 | AHSA1     |
| 41278_at   | AF041474 | ACTL6A    |
| 1979_s_at  | X55504   | NOL1      |
| 31504_at   | M64098   | HDLBP     |
| 40349_at   | AL049442 | CBR4      |
| 36916_at   | X74570   | ST3GAL4   |
| 38640_at   | AI582831 | ZNF593    |
| 33437_at   | AJ005892 | FTSJ1     |
| 34299_at   | AL096880 | PATZ1     |
| 36647_at   | AA526812 | IARS2     |
| 36673_at   | X76057   | MPI       |
| 33195_at   | M94065   | DHODH     |
| 525_g_at   | U13695   | PMS1      |
| 34647_at   | AF015812 | DDX5      |
| 35467_g_at | W73046   | DNAJB12   |
| 37794_at   | AF035281 | LOC791120 |
| 38584_at   | AF026939 | IFIT3     |
| 40684_at   | U78190   | GCHFR     |
| 40712_at   | D26579   | ADAM8     |
| 41081_at   | AF053305 | BUB1      |
| 41385_at   | AB023204 | EPB41L3   |
| 41692_at   | AB020717 | SYNJ1     |
| 33748_at   | D86976   | HMHA1     |
| 34719_at   | AB020645 | GLS       |

**Supplemental Table 2: List of 1462 Transient Genes**

|            |          |          |
|------------|----------|----------|
| 34760_at   | D14664   | CD302    |
| 35154_at   | W68046   | BTBD2    |
| 35694_at   | AB014587 | MAP4K4   |
| 35720_at   | AB020700 | WDR47    |
| 36044_at   | AF022912 | PDE6D    |
| 36514_at   | U66469   | CGRRF1   |
| 37228_at   | L19559   | PLK1     |
| 37962_r_at | D63506   | STXBP3   |
| 39421_at   | D43969   | RUNX1    |
| 39428_at   | AF055581 | SH2B3    |
| 39753_at   | X06256   | ITGA5    |
| 39774_at   | X80695   | OXA1L    |
| 40123_at   | D87435   | GBF1     |
| 40141_at   | AB014595 | CUL4B    |
| 40426_at   | X89985   | BCL7B    |
| 40478_at   | AL021396 | TXNDC13  |
| 40791_at   | X63564   | POLR2A   |
| 40813_at   | AI768188 | SLC5A3   |
| 41183_at   | U15782   | CSTF3    |
| 32776_at   | M35416   | RALB     |
| 41138_at   | M16279   | CD99     |
| 41140_at   | U05875   | IFNGR2   |
| 32169_at   | AB020682 | FBXO21   |
| 35365_at   | U40282   | ILK      |
| 34843_at   | AL044599 | ZNF516   |
| 35254_at   | AB007447 | TRAFD1   |
| 35776_at   | AF064243 | ITSN1    |
| 35811_at   | AF037204 | RNF13    |
| 35833_at   | AL080184 | INSIG2   |
| 36118_at   | AJ000882 | NCOA1    |
| 36139_at   | AL050289 | TRAF3IP2 |
| 36975_at   | W26659   | TMEM66   |
| 37028_at   | U83981   | PPP1R15A |
| 37326_at   | U93305   | PLP2     |
| 37378_r_at | M13452   | LMNA     |
| 37652_at   | AB002328 | CABIN1   |
| 37733_at   | L35263   | MAPK14   |
| 37747_at   | U05770   | ANXA5    |
| 38081_at   | J03459   | LTA4H    |
| 38373_g_at | U66042   | CXorf40B |
| 38832_r_at | AF053356 | GNB2     |
| 39091_at   | AF070523 | ARL6IP5  |
| 39809_at   | AF019214 | HBP1     |
| 40220_at   | AB021179 | HEXIM1   |
| 41273_at   | AL046940 | MXRA7    |
| 41808_at   | AF052102 | DMTF1    |
| 1867_at    | AF005775 | CFLAR    |
| 1686_g_at  | X82554   | SPHAR    |
| 1599_at    | L25876   | CDKN3    |
| 1584_at    | M34065   | CDC25C   |
| 1367_f_at  | M26880   | UBC      |

**Supplemental Table 2: List of 1462 Transient Genes**

|            |          |          |
|------------|----------|----------|
| 1257_s_at  | L42379   | QSOX1    |
| 1213_at    | U88666   | SRPK2    |
| 859_at     | U03688   | CYP1B1   |
| 816_g_at   | U70987   | DOK1     |
| 752_s_at   | D85429   | DNAJB1   |
| 493_at     | U29171   | CSNK1D   |
| 178_f_at   | U38964   | PMS2L8   |
| 33800_at   | AF036927 | ADCY9    |
| 34852_g_at | AF011468 | AURKA    |
| 40631_at   | D38305   | TOB1     |
| 1563_s_at  | M58286   | TNFRSF1A |
| 621_at     | M28211   | RAB4A    |
| 33700_at   | AF039843 | SPRY2    |
| 37597_s_at | AF055006 | EXOC3    |
| 32060_at   | U15173   | BNIP2    |
| 37727_i_at | X78669   | RCN2     |
| 33901_at   | U81375   | SLC29A1  |
| 38372_at   | U66042   | CXorf40B |
| 1945_at    | M25753   | CCNB1    |
| 38725_s_at | N36295   | DPM2     |
| 35751_at   | U17886   | SDHB     |
| 39965_at   | AI570572 | RAC3     |
| 41454_at   | W27949   | HEBP2    |
| 36846_s_at | AA121509 | LSM7     |
| 33439_at   | D15050   | ZEB1     |
| 39852_at   | AB011182 | SPG20    |
| 39210_at   | M58597   | FUT4     |
| 41057_at   | AI760162 | THEM2    |
| 31793_at   | AL036554 | DEFA1    |
| 38282_at   | U41767   | ADAM15   |
| 38683_s_at | AB029008 | MASK-BP3 |
| 39338_at   | AI201310 | S100A10  |
| 40072_at   | Z68747   | MRPS31   |
| 1827_s_at  | M13929   | MYC      |
| 394_at     | X92106   | BLMH     |
| 39060_at   | D38048   | PSMB7    |
| 39734_at   | U10117   | SCYE1    |
| 32262_at   | AL049669 | KIAA0859 |
| 33415_at   | X58965   | NME2     |
| 34396_at   | AB023195 | ASXL1    |
| 35331_at   | U97067   | CTNNA1   |
| 39847_at   | AF040965 | NOL14    |
| 1250_at    | U47077   | PRKDC    |
| 33689_s_at | AF012434 | DDT      |
| 41371_at   | Y07595   | GTF2H4   |
| 32051_at   | AJ224875 | ALG8     |
| 39001_at   | AF047470 | MDH2     |
| 39341_at   | AJ001902 | TRIP6    |
| 41163_at   | AL109672 | TMED3    |
| 34336_at   | D32053   | KARS     |
| 41583_at   | AC004770 | FEN1     |



**Supplemental Table 2: List of 1462 Transient Genes**

|            |          |          |
|------------|----------|----------|
| 32614_at   | AB018278 | SV2B     |
| 1752_at    | AD000092 | CALR     |
| 1476_s_at  | U22376   | MYB      |
| 36446_s_at | L24521   | HDGF     |
| 31859_at   | J05070   | MMP9     |
| 38978_at   | AF013758 | PAIP1    |
| 39070_at   | U03057   | FSCN1    |
| 40063_at   | U22897   | CALCOCO2 |
| 33817_at   | S63912   | HNRPA3P1 |
| 33433_at   | AL049943 | FAM98A   |
| 36198_at   | D13641   | TOMM20   |
| 36200_at   | X69838   | EHMT2    |
| 32593_at   | D42043   | RFTN1    |
| 631_g_at   | L39874   | DCTD     |
| 31600_s_at | D38435   | PMS2L1   |
| 31691_g_at | U08997   | NA       |
| 31699_at   | S67334   | PIK3CB   |
| 33641_g_at | Y14768   | AIF1     |
| 36447_at   | S80990   | FCN1     |
| 33989_f_at | W28869   | TEGT     |
| 35385_at   | AI766078 | COQ7     |
| 35465_at   | AC003083 | SLC25A40 |
| 35872_at   | U38178   | PDE3B    |
| 37475_at   | AC004144 | WDR62    |
| 38187_at   | D90041   | NAT1     |
| 41665_at   | AB020631 | PCF11    |
| 41421_at   | AB020716 | CAMTA2   |
| 41662_at   | AL050272 | NECAP1   |
| 32069_at   | AB014515 | N4BP1    |
| 32622_at   | L36983   | DNM2     |
| 33264_at   | X89602   | ENOSF1   |
| 33330_at   | U41763   | CLTCL1   |
| 33770_at   | AF009225 | CHUK     |
| 33776_at   | AL050062 | RWDD3    |
| 35184_at   | AB011118 | CCDC131  |
| 35625_at   | X94630   | CD97     |
| 35693_at   | AF070616 | HPCAL1   |
| 35714_at   | U89606   | PDXK     |
| 36090_at   | AL080162 | TBL2     |
| 37220_at   | M63835   | FCGR1A   |
| 37986_at   | M60459   | EPOR     |
| 38652_at   | AF070644 | C10orf26 |
| 38656_s_at | W27939   | TMEM106C |
| 38662_at   | AL047596 | CIC      |
| 38690_at   | AL080097 | CLDND1   |
| 38993_r_at | W27522   | TGOLN2   |
| 40784_at   | Z69030   | PPP2R5C  |
| 40066_at   | AF046024 | UBE1C    |
| 40069_at   | AF051851 | SVIL     |
| 40130_at   | U06863   | FSTL1    |
| 40137_at   | M31724   | PTPN1    |

**Supplemental Table 2: List of 1462 Transient Genes**

|            |               |           |
|------------|---------------|-----------|
| 40145_at   | AI375913      | TOP2A     |
| 40473_at   | AF024636      | STK24     |
| 40786_at   | U37352        | PPP2R5C   |
| 41762_at   | D64015        | TIAL1     |
| 32184_at   | X61118        | LMO2      |
| 32857_at   | L13858        | SOS2      |
| 33827_at   | AL049783      | PFAAP5    |
| 32804_at   | AF091263      | RBM5      |
| 33884_s_at | AB014584      | UBE4B     |
| 33924_at   | AB029014      | RAB6IP1   |
| 35266_at   | AL049288      | BLCAP     |
| 34889_at   | AA056747      | ATP6V1A   |
| 35286_r_at | X76302        | RY1       |
| 35816_at   | U46692        | CSTB      |
| 36143_at   | U13737        | CASP3     |
| 36146_at   | AF057297      | OAZ2      |
| 36162_at   | X64364        | BSG       |
| 36994_at   | M62762        | ATP6V0C   |
| 37307_at   | X04828        | GNAI2     |
| 38042_at   | X03674        | G6PD      |
| 37383_f_at | L38504        | HLA-B     |
| 37693_at   | L40393        | NUMB      |
| 37748_at   | D86985        | KIAA0232  |
| 38423_at   | L38935        | FAM134C   |
| 38815_at   | Y08999        | ARPC1A    |
| 38743_f_at | X06409        | RAF1      |
| 41528_at   | W72239        | LOC130074 |
| 41552_g_at | AW044624      | RER1      |
| 32592_at   | AB002321      | KIAA0323  |
| 1920_s_at  | X77794        | CCNG1     |
| 1903_at    | HG3521-HT3715 | NA        |
| 1703_g_at  | S75174        | E2F4      |
| 1685_at    | X82554        | SPHAR     |
| 1463_at    | M93425        | PTPN12    |
| 1444_at    | AB003177      | PSMD9     |
| 975_at     | Y13115        | PLK4      |
| 832_at     | U39317        | UBE2D2    |
| 588_at     | M31724        | PTPN1     |
| 418_at     | X65550        | MKI67     |
| 147_at     | U82130        | TSG101    |
| 35218_at   | AF022385      | PDCD10    |
| 40413_at   | U18321        | DAP3      |
| 31526_f_at | X63547        | USP6      |
| 41716_at   | AB020663      | DMXL2     |
| 1854_at    | X13293        | MYBL2     |
| 969_s_at   | X98296        | USP9X     |
| 39733_at   | D14695        | HERPUD1   |
| 41234_at   | AI540318      | NA        |
| 34546_at   | AI250799      | DEFA4     |
| 38695_at   | AF020351      | NDUFS4    |
| 39704_s_at | L17131        | HMGA1     |

**Supplemental Table 2: List of 1462 Transient Genes**

|            |               |          |
|------------|---------------|----------|
| 37738_g_at | D25547        | PCMT1    |
| 39040_at   | W28360        | UBE2J1   |
| 40412_at   | AA203476      | PTTG1    |
| 41177_at   | AW024285      | AYTL2    |
| 32255_i_at | U40705        | TERF1    |
| 32869_at   | AF073362      | MRE11A   |
| 38161_at   | Y09022        | ALG3     |
| 33255_at   | M97856        | NASP     |
| 41759_at   | Z47087        | SKP1A    |
| 38119_at   | X12496        | GYPC     |
| 40588_r_at | AF054186      | EEF1E1   |
| 2003_s_at  | U28946        | MSH6     |
| 1969_s_at  | X77743        | CDK7     |
| 41868_at   | D87002        | GGT1     |
| 32786_at   | X51345        | JUNB     |
| 1980_s_at  | X58965        | NME2     |
| 1624_at    | HG2036-HT2090 | NA       |
| 1020_s_at  | U85611        | CIB1     |
| 31927_s_at | D86062        | C21orf33 |
| 41370_at   | AF090988      | WDR57    |
| 31880_at   | D83767        | UBXD6    |
| 33273_f_at | J03011        | IGLJ3    |
| 33726_at   | U89387        | POLR2D   |
| 35979_at   | AF081287      | CTDP1    |
| 35723_at   | D16581        | NUDT1    |
| 40125_at   | L10284        | CANX     |
| 40129_at   | U47077        | PRKDC    |
| 36624_at   | L33842        | IMPDH2   |
| 37720_at   | M22382        | HSPD1    |
| 38826_at   | D50918        | 39697    |
| 39817_s_at | AF040105      | C6orf108 |
| 374_f_at   | Z84718        | DDT      |
| 36496_at   | AF014398      | IMPA2    |
| 37981_at   | U00802        | DBN1     |
| 37955_at   | AB015631      | TMEM4    |
| 39695_at   | M31516        | CD55     |
| 34368_at   | U31814        | HDAC2    |
| 36968_s_at | AL050353      | EXOSC8   |
| 37329_at   | AF053070      | NDUFV1   |
| 1242_at    | U15655        | ERF      |
| 947_at     | D55716        | MCM7     |
| 168_at     | U50196        | ADK      |
| 34743_at   | D63481        | SCRIB    |
| 37229_at   | U49844        | ATR      |
| 35801_at   | AF026816      | ITPA     |
| 37031_at   | D80005        | FAM120A  |
| 40584_at   | Y08612        | NUP88    |
| 41838_at   | X99270        | UCHL5IP  |
| 32579_at   | D26156        | SMARCA4  |
| 31788_at   | AB014537      | ZBED4    |
| 36520_at   | AB014590      | RRP12    |

**Supplemental Table 2: List of 1462 Transient Genes**

|            |          |           |
|------------|----------|-----------|
| 37648_at   | D63487   | TTLL12    |
| 34353_at   | AB014548 | PDS5A     |
| 37297_at   | AL049422 | RBM13     |
| 38778_at   | AB028969 | OTUD4     |
| 41824_at   | AI140114 | NME1      |
| 31935_s_at | U75968   | DDX11     |
| 33659_at   | X95404   | CFL1      |
| 32335_r_at | AB009010 | UBC       |
| 35488_at   | U44754   | SNAPC1    |
| 38523_f_at | D49677   | ZRSR2     |
| 39931_at   | Y12735   | DYRK3     |
| 39601_at   | AF061836 | RASSF1    |
| 39651_at   | AB006532 | RECQL4    |
| 41387_r_at | AB002344 | JMJD3     |
| 41467_at   | AF070071 | MSH5      |
| 32120_at   | AF063308 | SPAG5     |
| 41627_at   | D50645   | SDF2      |
| 41651_at   | AB028956 | KIAA1033  |
| 31872_at   | X79201   | SS18      |
| 32059_at   | U79282   | LOC137886 |
| 32621_at   | M97388   | DR1       |
| 32624_at   | AL050050 | GARNL1    |
| 32697_at   | AF042729 | IMPA1     |
| 33741_at   | AI741756 | ATP6V1H   |
| 34210_at   | N90866   | CD52      |
| 32736_at   | W68830   | RAC2      |
| 33256_at   | W28626   | SLC25A12  |
| 33752_at   | AB020657 | IVNS1ABP  |
| 36083_at   | U01160   | TSPAN31   |
| 35688_g_at | Z24459   | MTCPI     |
| 36492_at   | AI347155 | WDR66     |
| 36530_g_at | AI885381 | TRAPPC6A  |
| 36542_at   | AF030409 | SLC9A6    |
| 36837_at   | U63743   | KIF2C     |
| 37598_at   | D79990   | RASSF2    |
| 39044_s_at | D73409   | DGKD      |
| 39335_at   | AI074025 | EIF5A     |
| 39336_at   | M74491   | ARF3      |
| 39714_at   | AF042081 | SH3BGRL   |
| 39411_at   | AL080156 | TIPARP    |
| 39691_at   | AB007960 | SH3GLB1   |
| 39778_at   | M55621   | MGAT1     |
| 40410_at   | W26651   | DCTN3     |
| 40787_at   | U90911   | WIPF2     |
| 40826_at   | M80359   | MARK3     |
| 41127_at   | L14595   | SLC1A4    |
| 41736_g_at | AI808958 | DENND3    |
| 41766_at   | D55649   | MAN2A2    |
| 33907_at   | AF012072 | EIF4G3    |
| 33346_r_at | M61764   | TUBG1     |
| 35263_at   | N73769   | EIF4EBP2  |

**Supplemental Table 2: List of 1462 Transient Genes**

|            |          |          |
|------------|----------|----------|
| 34789_at   | S69272   | SERPINB6 |
| 34803_at   | AF022789 | USP12    |
| 34851_at   | AF011468 | AURKA    |
| 35311_at   | AF084523 | CREG1    |
| 35765_at   | X91504   | ARFRP1   |
| 36110_at   | M28215   | RAB5A    |
| 36672_at   | L13977   | PRCP     |
| 37381_g_at | X59268   | GTF2B    |
| 38431_at   | U09759   | MAPK9    |
| 39552_at   | U92436   | PTEN     |
| 38474_at   | L00972   | CBS      |
| 38739_at   | AF017257 | ETS2     |
| 39896_at   | AB011149 | DHX16    |
| 40278_at   | AB029003 | GGA2     |
| 40898_at   | U46751   | SQSTM1   |
| 40992_s_at | AF055993 | SAP30    |
| 41333_at   | D26069   | CENTB2   |
| 41561_s_at | AI651368 | IFT20    |
| 41569_at   | AI680675 | DNAJC9   |
| 32571_at   | X68836   | MAT2A    |
| 32504_at   | AW024812 | SNX27    |
| 32510_at   | AF026947 | AKR7A2   |
| 33120_at   | AF045229 | RGS10    |
| 2093_s_at  | J04977   | XRCC5    |
| 2010_at    | U33760   | SKP1A    |
| 1860_at    | U58334   | TP53BP2  |
| 1846_at    | L78132   | LGALS8   |
| 1817_at    | D89667   | PFDN5    |
| 1315_at    | D78361   | OAZ1     |
| 1238_at    | U09759   | MAPK9    |
| 935_at     | L12168   | CAP1     |
| 1130_at    | L11284   | MAP2K1   |
| 890_at     | M74524   | UBE2A    |
| 809_at     | U57094   | RAB27A   |
| 824_at     | U90313   | GSTO1    |
| 610_at     | M15169   | ADRB2    |
| 503_at     | U37690   | POLR2L   |
| 384_at     | X71874   | PSMB10   |
| 288_s_at   | L25931   | LBR      |
| 181_g_at   | S82470   | LENG4    |
| 35289_at   | AJ011679 | RABGAP1  |
| 38114_at   | D38551   | RAD21    |
| 37980_at   | U03644   | CIR      |
| 38276_at   | U91616   | NFKBIE   |
| 1962_at    | M14502   | ARG1     |
| 1031_at    | U09564   | SRPK1    |
| 39581_at   | AA570193 | CSTA     |
| 34260_at   | AB014583 | TELO2    |
| 34733_at   | X85237   | SF3A1    |
| 38361_g_at | AI688812 | RASGRP2  |
| 1884_s_at  | M15796   | PCNA     |

**Supplemental Table 2: List of 1462 Transient Genes**

|            |          |          |
|------------|----------|----------|
| 35145_at   | X96401   | MNT      |
| 40420_at   | AB015718 | STK10    |
| 34845_at   | AL035398 | SAMM50   |
| 41681_at   | AB005289 | ABCB7    |
| 32669_at   | AB014571 | SOCS5    |
| 36913_at   | U75679   | SLBP     |
| 40845_at   | U10324   | ILF3     |
| 34393_r_at | AL050268 | RAB1A    |
| 189_s_at   | U09937   | PLAUR    |
| 32893_s_at | M30474   | GGT2     |
| 38257_at   | AF038406 | NDUFS8   |
| 39376_at   | AB014530 | HIPK1    |
| 32153_s_at | U49869   | UBB      |
| 35819_at   | X06994   | CYC1     |
| 37755_at   | AB023169 | BTBD3    |
| 33984_at   | M16660   | HSP90AB1 |
| 37471_at   | U94317   | RPP40    |
| 41696_at   | AI620381 | C7orf24  |
| 38628_at   | AF029777 | GCN5L2   |
| 33934_at   | AB018340 | SENP6    |
| 34829_at   | U59151   | DKC1     |
| 35270_at   | W16505   | SNRPD2   |
| 37046_at   | AI246726 | PSMA5    |
| 36178_at   | U23143   | SHMT2    |
| 36678_at   | D21261   | TAGLN2   |
| 38106_at   | AJ012409 | TINP1    |
| 38768_at   | X96752   | HADH     |
| 39165_at   | U47101   | ISCU     |
| 39814_s_at | AI052724 | DHRS7    |
| 41812_s_at | AB020713 | NUP210   |
| 1472_g_at  | U22376   | MYB      |
| 36001_at   | Y18643   | METTL1   |
| 37950_at   | X74496   | PREP     |
| 38353_at   | AF042378 | TUBGCP3  |
| 40764_at   | M22632   | GOT2     |
| 37320_at   | D14694   | PTDSS1   |
| 38792_at   | AD001528 | SMS      |
| 40189_at   | M93651   | SET      |
| 40596_at   | U76366   | TCOF1    |
| 41595_at   | AB023164 | KIAA0947 |
| 41461_at   | U13695   | PMS1     |
| 41415_at   | L36720   | BYSL     |
| 41861_at   | AL050019 | NOC2L    |
| 31836_at   | L34600   | MTIF2    |
| 34259_at   | AB014564 | KIAA0664 |
| 38633_at   | U35113   | MTA1     |
| 39788_at   | U81005   | PKP4     |
| 32151_at   | X82260   | RANGAP1  |
| 32844_at   | AF104913 | EIF4G1   |
| 33409_at   | AA158243 | FKBP2    |
| 35298_at   | U54558   | EIF3D    |

**Supplemental Table 2: List of 1462 Transient Genes**

|            |               |          |
|------------|---------------|----------|
| 35312_at   | D21063        | MCM2     |
| 35326_at   | AF004876      | YIF1A    |
| 40255_at   | AC004531      | DDX28    |
| 41831_at   | AF077820      | LRP5     |
| 36727_at   | M64936        | NA       |
| 40476_s_at | U58198        | FOXK2    |
| 36603_at   | D86973        | GCN1L1   |
| 1188_g_at  | X84740        | LIG3     |
| 31516_f_at | M90354        | BTF3L1   |
| 31948_at   | X79563        | RPS21    |
| 33602_at   | AJ000479      | EDG6     |
| 36444_s_at | AF088219      | CCL23    |
| 36781_at   | X01683        | SERPINA1 |
| 38492_at   | D55639        | KYNU     |
| 40669_at   | U57094        | RAB27A   |
| 41083_at   | AC006276      | ZNF428   |
| 34721_at   | U42031        | FKBP5    |
| 37617_at   | U90912        | KIAA1128 |
| 38340_at   | AB014555      | HIP1R    |
| 38653_at   | D11428        | PMP22    |
| 32750_r_at | X53416        | FLNA     |
| 37001_at   | M23254        | CAPN2    |
| 38078_at   | AF042166      | FLNB     |
| 32541_at   | S46622        | PPP3CC   |
| 2011_s_at  | U34584        | BIK      |
| 40012_at   | D86407        | LRP8     |
| 33162_at   | X02160        | INSR     |
| 34378_at   | X97324        | ADFP     |
| 40391_at   | AB007448      | SLC22A4  |
| 36980_at   | U03105        | PNRC1    |
| 38767_at   | AF041037      | SPRY1    |
| 37904_s_at | X66436        | GNL1     |
| 1274_s_at  | L22005        | CDC34    |
| 38997_at   | X96924        | SLC25A1  |
| 39772_at   | AF007157      | PRNPIP   |
| 1527_s_at  | U50527        | CG018    |
| 37162_at   | S72869        | CCDC6    |
| 34261_at   | D84307        | PCYT2    |
| 34470_at   | D43945        | TFEC     |
| 40018_at   | AB007870      | NUPL1    |
| 40385_at   | U64197        | CCL20    |
| 41619_at   | AL022398      | IRF6     |
| 35668_at   | AJ001014      | RAMP1    |
| 35718_at   | L22342        | SP110    |
| 40836_s_at | W26677        | EML3     |
| 36657_at   | AA883870      | APOC2    |
| 38458_at   | L39945        | CYB5A    |
| 40964_at   | Z46369        | HK2      |
| 1790_s_at  | HG3914-HT4184 | NA       |
| 1642_at    | U35113        | MTA1     |
| 447_g_at   | U89896        | CSNK1G2  |

**Supplemental Table 2: List of 1462 Transient Genes**

|            |               |          |
|------------|---------------|----------|
| 41232_at   | AL050022      | TCTN3    |
| 32118_at   | AF076838      | RAD17    |
| 38513_at   | D31765        | POP1     |
| 33744_at   | AL080150      | GEMIN4   |
| 34300_at   | AI352450      | PATZ1    |
| 37713_at   | L07548        | ACY1     |
| 41790_at   | AL031230      | ALDH5A1  |
| 38241_at   | U90548        | BTN3A3   |
| 38917_at   | X73617        | TRA@     |
| 41442_at   | AB010419      | CBFA2T3  |
| 33724_at   | U64805        | BRCA1    |
| 38694_at   | AB018281      | FAM115A  |
| 39786_at   | AF070525      | GRPEL1   |
| 41503_at   | AB020661      | ZHX2     |
| 37347_at   | AA926959      | CKS1B    |
| 38251_at   | X16434        | MYL6B    |
| 33849_at   | U02020        | PBEF1    |
| 1162_g_at  | HG3227-HT3404 | NA       |
| 31814_i_at | AB009462      | LRP3     |
| 32679_at   | D13634        | MTFR1    |
| 33232_at   | AI017574      | CRIP1    |
| 33274_f_at | X79783        | IGL@     |
| 34734_at   | X71661        | LMAN1    |
| 38966_at   | AF038958      | GPSN2    |
| 38436_at   | D87440        | RTF1     |
| 38757_at   | U41745        | PDAP1    |
| 40591_at   | S78234        | CDC27    |
| 1480_at    | L12723        | HSPA4    |
| 1410_at    | J03258        | VDR      |
| 37391_at   | X12451        | CTSL1    |
| 39556_at   | M96803        | SPTBN1   |
| 1065_at    | U02687        | FLT3     |
| 37121_at   | S69115        | NKG7     |
| 2061_at    | L12002        | ITGA4    |
| 38911_at   | U41815        | NUP98    |
| 32402_s_at | Y10931        | SYMPK    |
| 37416_at   | Z35227        | RHOH     |
| 39258_at   | AI627877      | RNF126   |
| 32974_at   | U07563        | EXOSC2   |
| 40032_at   | D50923        | KIAA0133 |
| 38454_g_at | X15606        | ICAM2    |
| 34482_at   | AF040964      | C4orf15  |
| 38201_at   | U21551        | BCAT1    |
| 31815_r_at | AB009462      | LRP3     |
| 34263_s_at | Y15908        | DIAPH2   |
| 35672_at   | AL080144      | AHCTF1   |
| 39835_at   | U93181        | SBF1     |
| 39883_at   | AF091078      | DIMT1L   |
| 41001_at   | AB023202      | RPH3A    |
| 41509_at   | L11066        | HSPA9    |
| 33206_at   | C18655        | ABBA-1   |



**Supplemental Table 2: List of 1462 Transient Genes**

|            |               |           |
|------------|---------------|-----------|
| 1376_at    | M36067        | LIG1      |
| 31842_at   | AF038195      | BCS1L     |
| 39729_at   | L19185        | PRDX2     |
| 37838_at   | M31315        | F12       |
| 37749_at   | D78611        | MEST      |
| 31605_at   | U72518        | LOC171220 |
| 39653_at   | AL050120      | POT1      |
| 36566_at   | AJ222967      | CTNS      |
| 41149_at   | AC004381      | LOC81691  |
| 41775_at   | AF064084      | ICMT      |
| 36205_at   | L04490        | NDUFA9    |
| 37360_at   | U66711        | LY6E      |
| 1717_s_at  | U45878        | BIRC3     |
| 36689_at   | AL040446      | OSBPL1A   |
| 38218_at   | M97347        | GCNT1     |
| 41352_at   | AF007133      | ST6GAL1   |
| 1822_at    | HG4677-HT5102 | NA        |
| 35071_s_at | AF042377      | GMDS      |
| 34190_at   | AF006740      | COCH      |
| 35657_at   | U08998        | TARBP2    |
| 36462_at   | U50383        | SMYD5     |
| 38007_at   | L11353        | NF2       |
| 38726_at   | W80399        | DPM2      |
| 40973_at   | AI146846      | PARD3     |
| 40280_at   | U72508        | LRRC23    |
| 1590_s_at  | J00277        | HRAS      |
| 39387_at   | U34044        | SEPHS1    |
| 40183_at   | AI660225      | YIPF2     |
| 1462_s_at  | M80397        | POLD1     |
| 34583_at   | U02687        | FLT3      |
| 32213_at   | AA203527      | POP7      |
| 37649_at   | M95623        | HMBS      |
| 40936_at   | AI651806      | CRIM1     |
| 36891_at   | AL022237      | MCAT      |
| 37993_at   | X63422        | ATP5D     |
| 35792_at   | U67963        | MGLL      |
| 2057_g_at  | M34641        | FGFR1     |
| 33202_f_at | U43747        | FXN       |
| 37225_at   | D79994        | ANKRD15   |
| 2020_at    | M73554        | CCND1     |
| 1071_at    | M77810        | GATA2     |
| 37832_at   | AL080062      | MMACHC    |
| 34805_at   | AA195301      | CCDC86    |
| 160026_at  | X85545        | PRKX      |
| 31392_r_at | U88965        | C3orf51   |
| 31625_at   | AB007921      | C1orf34   |
| 31438_s_at | Z22971        | CD163     |
| 31524_f_at | Z80782        | HIST1H2BI |
| 31783_at   | U52112        | RENBP     |
| 32389_at   | W25892        | RNU2      |
| 32475_at   | AF025529      | LILRA1    |

**Supplemental Table 2: List of 1462 Transient Genes**

|            |          |           |
|------------|----------|-----------|
| 33034_at   | Y17108   | RHBDL1    |
| 33042_r_at | AF055018 | FAM55C    |
| 33647_s_at | AA224768 | GM2A      |
| 34083_at   | AA311181 | 15E1.2    |
| 35016_at   | M13560   | CD74      |
| 35114_at   | AF084645 | NR1I2     |
| 36377_at   | U43672   | IL18R1    |
| 36400_at   | AA831707 | PRIM1     |
| 36412_s_at | U53831   | IRF7      |
| 32355_at   | AL050270 | TANC2     |
| 32977_at   | U49187   | C6orf32   |
| 33462_at   | D13626   | P2RY14    |
| 33487_at   | D31628   | HPD       |
| 33535_at   | U45448   | P2RX1     |
| 33538_at   | H96671   | MYEF2     |
| 33954_at   | AL049988 | ITPR2     |
| 33956_at   | AB018549 | LY96      |
| 33983_at   | Z33642   | IGSF2     |
| 34977_at   | AJ007395 | SIGLEC7   |
| 34478_at   | X79780   | RAB11B    |
| 34498_at   | D89974   | VNN2      |
| 34509_at   | AF016833 | MGAM      |
| 34946_at   | AJ223183 | IGSF6     |
| 35000_at   | U03398   | TNFSF9    |
| 35892_at   | Y00816   | CR1       |
| 36223_at   | AI809970 | SFPQ      |
| 36243_at   | AL050262 | TLR1      |
| 36255_at   | L77730   | ADORA3    |
| 36324_at   | X68487   | ADORA2B   |
| 36709_at   | Y00093   | ITGAX     |
| 36724_s_at | U95626   | CCR5      |
| 36759_at   | U29589   | CHRM3     |
| 37068_at   | U24577   | PLA2G7    |
| 37112_at   | AB002384 | C6orf32   |
| 37114_at   | L32832   | ZFHX3     |
| 38167_at   | AB020704 | PPFIA4    |
| 38576_at   | AJ223353 | HIST1H2BD |
| 37148_at   | AF025533 | LILRB3    |
| 37489_s_at | U05596   | SLC4A3    |
| 37490_at   | L27213   | SLC4A3    |
| 37769_at   | AF011466 | EDG4      |
| 37835_at   | M28827   | CD1C      |
| 38131_at   | AF010316 | PTGES     |
| 38207_at   | AW006742 | TncRNA    |
| 38490_r_at | U00944   | CXorf45   |
| 38567_at   | L38820   | CD1D      |
| 38879_at   | D83664   | S100A12   |
| 39301_at   | X85030   | CAPN3     |
| 39313_at   | AB002342 | WNK1      |
| 39925_at   | M95610   | COL9A2    |
| 40648_at   | U08023   | MERTK     |

**Supplemental Table 2: List of 1462 Transient Genes**

|            |          |          |
|------------|----------|----------|
| 39603_at   | AB007926 | DISC1    |
| 40323_at   | D84276   | CD38     |
| 40656_at   | D85730   | HSPA1L   |
| 40700_at   | U36500   | SP140    |
| 40729_s_at | Y14768   | LTB      |
| 41059_at   | AF020314 | CD300A   |
| 41714_at   | AB007924 | LPPR4    |
| 41863_at   | AF070623 | RALYL    |
| 32026_s_at | AB002311 | RAPGEF2  |
| 32083_at   | AF027826 | GPR137B  |
| 33811_at   | AI761567 | CCPG1    |
| 32716_at   | AF064768 | DGKA     |
| 33224_at   | AB007965 | CYHR1    |
| 33236_at   | AF060228 | RARRES3  |
| 33777_at   | D34625   | TBXAS1   |
| 34224_at   | AC004770 | FADS3    |
| 34256_at   | AB018356 | ST3GAL5  |
| 34714_at   | AL050267 | SAMHD1   |
| 35160_at   | AF064491 | LDB1     |
| 35650_at   | AB002354 | PLEKHM1  |
| 36022_at   | AB007942 | DNAJC6   |
| 36082_at   | S71326   | CEACAM1  |
| 35626_at   | U30894   | SGSH     |
| 35674_at   | AB023211 | PADI2    |
| 35686_s_at | Z24459   | MTCP1    |
| 35692_at   | AL080235 | TMEM158  |
| 36004_at   | AF074382 | IKBKG    |
| 36059_at   | AB011540 | LRP4     |
| 36089_at   | AB023183 | INPP5F   |
| 36464_at   | X94323   | CRISP3   |
| 36825_at   | X82200   | TRIM22   |
| 37603_at   | X52015   | IL1RN    |
| 37970_at   | AB028989 | MAPK8IP3 |
| 37976_at   | AL034397 | VSIG4    |
| 37929_at   | AB017563 | CADM1    |
| 38291_at   | J00123   | PENK     |
| 38325_at   | AL050356 | MINPP1   |
| 38336_at   | AB023230 | FRMD4B   |
| 38721_at   | W72733   | CALCOCO1 |
| 38968_at   | AB005047 | SH3BP5   |
| 39054_at   | X08020   | GSTM1    |
| 39706_at   | AB014536 | CPNE3    |
| 40782_at   | AF061741 | DHRS3    |
| 39361_f_at | AF043906 | TSPAN6   |
| 39432_at   | AF038662 | B4GALT4  |
| 39771_at   | AB018283 | RHOBTB1  |
| 40046_r_at | AF009426 | C18orf1  |
| 40049_at   | X76104   | DAPK1    |
| 40155_at   | D31883   | ABLIM1   |
| 40519_at   | Y00638   | PTPRC    |
| 40520_g_at | Y00638   | PTPRC    |

**Supplemental Table 2: List of 1462 Transient Genes**

|            |          |              |
|------------|----------|--------------|
| 40815_g_at | L40586   | IDS          |
| 40825_at   | AB025186 | MAPRE3       |
| 41191_at   | AB023209 | PALLD        |
| 32156_at   | AF044968 | PVRL2        |
| 40863_r_at | X15334   | CKB          |
| 32176_at   | AB011110 | RASA4        |
| 32200_at   | M24902   | ACPP         |
| 32217_at   | AF052105 | FAM130A1     |
| 32747_at   | X05409   | ALDH2        |
| 32765_f_at | W28330   | PGCP         |
| 33366_at   | AL022238 | SGSM3        |
| 34339_at   | AB009282 | CYB5B        |
| 35350_at   | AB011170 | GALNAC4S-6ST |
| 34784_at   | Z83844   | TRIOBP       |
| 34844_at   | D86975   | ZNF516       |
| 35287_at   | AF046888 | TNFSF13      |
| 35755_at   | U51336   | ITPK1        |
| 35829_at   | AL080181 | CADM1        |
| 36618_g_at | X77956   | ID1          |
| 36977_at   | U39412   | NAPA         |
| 37303_at   | AF057160 | PARP4        |
| 37706_at   | U28811   | GLG1         |
| 37687_i_at | M31932   | FCGR2A       |
| 37760_at   | AB015019 | BAIAP2       |
| 37767_at   | Z49155   | HD           |
| 38021_at   | U53204   | PLEC1        |
| 38107_at   | U40998   | UNC119       |
| 38404_at   | M55153   | TGM2         |
| 38735_at   | AB011085 | KIAA0513     |
| 39545_at   | U22398   | CDKN1C       |
| 39833_at   | R54564   | MINK1        |
| 39837_s_at | AC004877 | ZNF467       |
| 38740_at   | X79067   | ZFP36L1      |
| 38799_at   | AF068706 | APIG2        |
| 39893_at   | AB010414 | GNG7         |
| 40268_at   | X16706   | FOSL2        |
| 40175_at   | AI141670 | FAM131A      |
| 40539_at   | U42391   | MYO9B        |
| 40626_at   | AI693193 | MTX1         |
| 40913_at   | W28589   | ATP2B4       |
| 41257_at   | D16217   | CAST         |
| 41323_at   | U90917   | FOXMI        |
| 41493_at   | AI094610 | ATP11A       |
| 41518_at   | AI925356 | YKT6         |
| 32533_s_at | AF054825 | VAMP5        |
| 2017_s_at  | M64349   | CCND1        |
| 2019_s_at  | M68892   | ITGB7        |
| 1779_s_at  | M16750   | PIM1         |
| 1786_at    | U08023   | MERTK        |
| 1729_at    | L41690   | TRADD        |
| 1671_s_at  | L35253   | MAPK14       |

**Supplemental Table 2: List of 1462 Transient Genes**

|           |               |         |
|-----------|---------------|---------|
| 1649_at   | U61836        | SMOX    |
| 1650_g_at | U61836        | SMOX    |
| 1575_at   | M14758        | ABCB1   |
| 1553_r_at | U22028        | CYP2A13 |
| 1491_at   | M31166        | PTX3    |
| 1375_s_at | M32304        | TIMP2   |
| 1232_s_at | M74587        | IGFBP1  |
| 1158_s_at | J04046        | CALM3   |
| 1120_at   | J05459        | GSTM3   |
| 1061_at   | U00672        | IL10RA  |
| 1062_g_at | U00672        | IL10RA  |
| 988_at    | X16354        | CEACAM1 |
| 973_at    | Y10032        | SGK     |
| 944_s_at  | D49354        | PPFIA1  |
| 874_at    | M26683        | CCL2    |
| 858_at    | S90469        | POR     |
| 294_s_at  | HG4120-HT4392 | NA      |
| 753_at    | D86425        | NID2    |
| 669_s_at  | L05072        | IRF1    |
| 599_at    | M60721        | HLX     |
| 556_s_at  | M96233        | GSTM4   |
| 544_at    | S76638        | NFKB2   |
| 496_s_at  | U32324        | IL11RA  |
| 491_at    | U46116        | PTPRG   |
| 484_at    | U59302        | NCOA1   |
| 449_at    | U66469        | CGRRF1  |
| 366_s_at  | Z29066        | NEK2    |
| 370_at    | Z35102        | STK38   |
| 371_at    | Z56281        | IRF3    |
| 203_at    | M68891        | GATA2   |
| 268_at    | L34657        | PECAM1  |
| 245_at    | M25280        | SELL    |
| 177_at    | U38545        | PLD1    |
| 160041_at | X79568        | PTPN18  |
| 160022_at | X03663        | CSF1R   |
