# Supplementary material for: Decomposition of Gene Expression State Space Trajectories
Source: PubMed Central journal article supplement (PMC2791157; doi:10.1371/journal.pcbi.1000626), 2009-12-24
Supplement: pcbi.1000626.s011.pdf [file pcbi.1000626.s011.pdf]

## Text S2: Computing the Fisher's Exact Test to Assess Overenrichment

For the 10 stimulus-induced genes by ATRA or DMSO (PTEN, Akt1, p27, RXR- $\alpha$ , p21, CITED2, RARRES3, MBN, CD38, SMYD5), 9 out of 10 were classified as transient genes.

|                        | <b>Stimulus-Induced Genes</b> | <b>Non-Stimulus Induced Genes</b> |                |
|------------------------|-------------------------------|-----------------------------------|----------------|
| <b>Transient Genes</b> | $X = 9$                       | 1461                              | $k = 1462$     |
| <b>Core Genes</b>      | 1                             | 1419                              | $N - k = 1428$ |
|                        | $M = 10$                      |                                   | $N = 2890$     |

The quantity  $X$  can be modeled as a hypergeometric random variable:

$$P(X = x) = \frac{\binom{M}{x} \binom{N-M}{k-x}}{\binom{N}{k}}$$

The statistical significance of seeing 9 out of 10 stimulus-induced genes represented in the transient group of genes corresponds to calculating the sum of probabilities greater than equal to what we observed.

$$P(X \geq 9) = \sum_{x=9}^{10} \frac{\binom{M}{x} \binom{N-M}{k-x}}{\binom{N}{k}} = 0.0117.$$

For the sixteen genes identified by [15, 16], thirteen were classified as core genes.

|                        | <b>Myeloid-Specific Differentiation Genes</b> | <b>Non-Myeloid-Specific Differentiation Genes</b> |                |
|------------------------|-----------------------------------------------|---------------------------------------------------|----------------|
| <b>Core Genes</b>      | $X = 13$                                      | 1415                                              | $k = 1428$     |
| <b>Transient Genes</b> | 3                                             | 1459                                              | $N - k = 1462$ |
|                        | $M = 16$                                      |                                                   | $N = 2890$     |

The statistical significance of seeing 13 out of 16 myeloid-specific differentiation genes represented in the core group of genes corresponds to calculating the sum of probabilities greater than equal to what we observed.

$$P(X \geq 13) = \sum_{x=13}^{16} \frac{\binom{M}{x} \binom{N-M}{k-x}}{\binom{N}{k}} = 0.00924.$$

Similarly, for the apoptosis-related genes:

|                        | <b>Apoptosis-Related Genes</b> | <b>Non-Apoptosis-Related Genes</b> |                |
|------------------------|--------------------------------|------------------------------------|----------------|
| <b>Core Genes</b>      | $X = 10$                       | 1418                               | $k = 1428$     |
| <b>Transient Genes</b> | 3                              | 1459                               | $N - k = 1462$ |
|                        | $M = 13$                       |                                    | $N = 2890$     |

$$P(X \geq 10) = \sum_{x=10}^{13} \frac{\binom{M}{x} \binom{N-M}{k-x}}{\binom{N}{k}} = 0.0418.$$
